1 Running title: Loss of synchronized intra-islet Ca<sup>2+</sup> oscillations *in vivo* in *Robo*-deficient  $\beta$  cells

2

3 **Islet architecture controls synchronous  $\beta$  cell response to glucose in the intact mouse**  
4 **pancreas *in vivo***

5

6 Melissa T. Adams<sup>1</sup>, Christopher A. Reissaus<sup>2</sup>, Joseph M. Szulczewski<sup>1</sup>, JaeAnn M. Dwulet<sup>3</sup>,

7 Melissa R. Lyman<sup>1</sup>, Sophia M. Sdao<sup>4</sup>, Sutichot D. Nimkulrat<sup>1</sup>, Suzanne M. Ponik<sup>1</sup>, Matthew J.

8 Merrins<sup>4</sup>, Richard K.P. Benninger<sup>3</sup>, Raghavendra G. Mirmira<sup>5</sup>, Amelia K. Linnemann<sup>2</sup>, Barak

9 Blum<sup>1\*</sup>

10

11 <sup>1</sup>Department of Cell and Regenerative Biology, University of Wisconsin-Madison, Madison, WI  
12 53705, USA

13 <sup>2</sup>Herman B Wells Center for Pediatric Research and Center for Diabetes and Metabolic Diseases,  
14 Indiana University School of Medicine, Indianapolis, IN 46202, USA

15 <sup>3</sup>Department of Bioengineering and Barbara Davis Center for Diabetes, University of Colorado  
16 Denver, Anschutz Medical Campus, Aurora, CO. 80045, USA

17 <sup>4</sup>Department of Medicine, Division of Endocrinology, Diabetes, and Metabolism, University of  
18 Wisconsin-Madison, Madison, Wisconsin 53705, USA

19 <sup>5</sup>Kovler Diabetes Center and the Department of Medicine, University of Chicago, Chicago, IL  
20 60637, USA

21

22 **\*Lead contact and Corresponding Author:** Barak Blum; bblum4@wisc.edu

23 **Abstract**

24 The spatial architecture of the islets of Langerhans is hypothesized to facilitate synchronized  
25 insulin secretion between  $\beta$  cells, yet testing this *in vivo* in the intact pancreas is challenging.  
26 *Robo*  $\beta$ KO mice, in which the genes *Robo1* and *Robo2* are deleted selectively in  $\beta$  cells, provide  
27 a unique model of altered islet architecture without loss of  $\beta$  cell differentiation or islet damage  
28 from diabetes. Combining *Robo*  $\beta$ KO mice with intravital microscopy, we show here that *Robo*  
29  $\beta$ KO islets lose synchronized intra-islet  $\text{Ca}^{2+}$  oscillations between  $\beta$  cells *in vivo*. We provide  
30 evidence that this loss is not due to a  $\beta$  cell-intrinsic function of Robo, loss of Connexin36 gap  
31 junctions, or changes in islet vascularization, suggesting that the islet architecture itself is  
32 required for synchronized  $\text{Ca}^{2+}$  oscillations. These results will have implications for  
33 understanding structure-function relationships in the islets during progression to diabetes as  
34 well as engineering islets from stem cells.

## 35 Introduction

36 The islets of Langerhans, which comprise the endocrine pancreas, are highly organized  
37 micro-organs responsible for maintaining blood glucose homeostasis. Islets are composed of  
38 five endocrine cell types ( $\alpha$ ,  $\beta$ ,  $\delta$ , PP, and  $\epsilon$ ) which, in rodents, are arranged such that the  $\beta$  cells  
39 reside in the core of the islet, while other non- $\beta$  endocrine cells populate the islet mantle<sup>1</sup>.  
40 Human islet architecture is more complex; however, it still follows non-random patterning in  
41 which multiple core-mantle-like units comprise a single islet<sup>2</sup>. In both rodent and human islets,  
42 respective stereotypical islet architectures prioritize homotypic over heterotypic interactions  
43 between endocrine cell types<sup>3</sup>. The biological reason for preferential homotypic interactions  
44 between endocrine cells is not completely clear, but it has been suggested to be important for  
45 dictating the level of Connexin36 (Cx36)-mediated electrical  $\beta$  cell- $\beta$  cell coupling, thus  
46 controlling synchronization of glucose-stimulated insulin secretion (GSIS) between neighboring  
47  $\beta$  cells<sup>4,5</sup>.

48 Synchronous insulin secretion between  $\beta$  cells is triggered when glucose from the blood  
49 enters the  $\beta$  cells through glucose transporters. As this glucose is metabolized, the ratio of  
50 intracellular ATP/ADP in the cells increases. The rise in ATP causes ATP sensitive  $K^+$  channels to  
51 close, resulting in membrane depolarization. The resultant depolarization causes voltage-gated  
52  $Ca^{2+}$  channels to open, triggering an influx of  $Ca^{2+}$  into the cell, which in turn promotes  
53 exocytosis of insulin granules<sup>6-8</sup>. This chain of events is cyclical and thus results in oscillations of  
54 membrane potential, cytosolic  $Ca^{2+}$  levels, and insulin secretion in response to glucose<sup>9</sup>.  
55 Because  $\beta$  cells within an islet are gap-junctionally coupled, and thus electrically coupled, these  
56 oscillations are synchronous across all islet  $\beta$  cells<sup>10</sup>. It is thus hypothesized that preferential  $\beta$

57 cell homotypic contact allows for the necessary amount of gap junctions to form between  
58 neighboring  $\beta$  cells in order to synchronize the oscillations in an entire islet, facilitating pulsatile  
59 insulin secretion<sup>5,11</sup>. Indeed, modeling experiments in which the number of homotypic  $\beta$  cell- $\beta$   
60 cell nearest neighbor connections is lowered within an islet result in predicted perturbation of  
61 synchronous  $\text{Ca}^{2+}$  oscillations<sup>5</sup>. If this *in silico* prediction is correct, then disrupting spatial  
62 organization of the different endocrine cell types within the islet alone, without affecting any  
63 other property of the cells, should be sufficient to disturb synchronized insulin secretion  
64 between  $\beta$  cells. However, direct empirical evidence for this hypothesis is lacking.

65 Most genetic mouse models that show disruption of islet architecture also display  
66 defects in glucose homeostasis<sup>12</sup>. However, in many of these models, the disrupted islet  
67 architecture phenotype is linked to either developmental defects in  $\beta$  cell differentiation or  
68 maturation<sup>13-24</sup> or to pathologies related to  $\beta$  cell damage in diabetes<sup>25-30</sup>. This introduces a  
69 strong confounding factor for studying the role of islet architecture on  $\beta$  cell function.  
70 Therefore current mouse models of disrupted islet architecture unsuitable for directly testing  
71 the hypothesis that the preferential homotypic  $\beta$  cell- $\beta$  cell interactions, dictated by canonical  
72 islet architecture, regulate synchronized insulin secretion between  $\beta$  cells within the same islet.

73 Recently, we have described a mouse model in which the cell-surface receptors *Robo1*  
74 and *Robo2* are deleted specifically in  $\beta$  cells (*Robo*  $\beta$ KO), resulting in disruption of canonical  
75 endocrine cell type sorting within the islets<sup>31</sup>. Unlike other models of disrupted islet  
76 architecture, the  $\beta$  cells in the islets of *Robo*  $\beta$ KO express normal levels of markers for  $\beta$  cell  
77 differentiation and functional maturity, and do not display markers of  $\beta$  cell damage or stress.

78 We reasoned that this model would allow us to directly test the role of islet architecture on  
79 synchronous islet oscillations between  $\beta$  cells in a fully differentiated, non-diabetic islet setting.

80

## 81 **Results**

### 82 ***Robo* $\beta$ KO islets express mature $\beta$ cell markers despite having disrupted islet architecture and 83 endocrine cell type intermixing**

84 We have previously shown that genetic deletion of *Robo1* and *Robo2* selectively in  $\beta$   
85 cells using either *Ins1-Cre; Robo1* <sup>$\Delta/\Delta$</sup> *2*<sup>*flx/flx*</sup> or *Ucn3-Cre; Robo1* <sup>$\Delta/\Delta$</sup> *2*<sup>*flx/flx*</sup> mice (*Robo*  $\beta$ KO) results in  
86 disrupted islet architecture and endocrine cell type sorting without affecting  $\beta$  cell death,  
87 proliferation, or the expression of the  $\beta$  cell maturation markers MafA and Ucn3<sup>31</sup>. To verify  
88 that  $\beta$  cells in *Robo*  $\beta$ KO islet are truly mature, we expanded the analysis to look at transcript  
89 levels of all maturity markers. We performed RNA sequencing and differential gene expression  
90 analysis on FACS-purified  $\beta$  cells from both *Robo*  $\beta$ KO and control islets, and observed no  
91 change in transcript levels of any hallmark  $\beta$  cell maturity or differentiation genes ( $n=2$  mice of  
92 each genotype; **Supplemental Figure 1**). Thus, unlike other mouse models with disrupted islet  
93 architecture,  $\beta$  cells in *Robo*  $\beta$ KO islets maintain maturity and differentiation despite loss of  
94 normal islet architecture.

95

### 96 ***Robo* $\beta$ KO islets have fewer homotypic $\beta$ cell- $\beta$ cell contacts than control islets**

97 *In silico* simulations where the degree of  $\beta$  cell- $\beta$  cell coupling is changed through a  
98 decrease in homotypic nearest neighbors predict that disruption in islet architecture will disrupt  
99 synchronous intra-islet Ca<sup>2+</sup> oscillations and hormone secretion pulses<sup>3,5,32</sup>. To test whether  $\beta$

100 cells in *Robo*  $\beta KO$  islets have fewer homotypic  $\beta$  cell neighbors on average than control islets,  
101 we performed nearest neighbor analysis on islets from pancreatic sections from *Robo*  $\beta KO$  and  
102 control mice (**Figure 1**). We found that *Robo*  $\beta KO$  islets possess significantly fewer  $\beta$  cell- $\beta$  cell  
103 contacts ( $n=9-11$  islets for 3 mice from each genotype; control 75.35%, *Robo*  $\beta KO$  50.37%,  
104  $p=0.01$ ), and homotypic contacts in general when compared to control islets ( $n=9-11$  islets for 3  
105 mice from each genotype; control 83.7%, *Robo*  $\beta KO$  64.43%,  $p=0.0008$ ). We also found that  
106 *Robo*  $\beta KO$  islets possess significantly more  $\beta$  cell- $\alpha$  cell contacts ( $n=9-11$  islets for 3 mice from  
107 each genotype; control 11.21%, *Robo*  $\beta KO$  25.99%,  $p=0.02$ ), and heterotypic contacts in general  
108 when compared to control islets ( $n=9-11$  islets for 3 mice from each genotype; control 16.3%,  
109 *Robo*  $\beta KO$  35.57%,  $p=0.0008$ ). Together, this suggests that *Robo*  $\beta KO$  islets make fewer  
110 homotypic  $\beta$  cell- $\beta$  cell connections compared to control islets. We reasoned that the altered  
111 degree of homotypic  $\beta$  cell- $\beta$  cell interaction in *Robo*  $\beta KO$  islets together with the seemingly  
112 retained  $\beta$  cell maturity provide a unique model by which to test the hypothesis that endocrine  
113 cell type organization affects synchronous insulin secretion in the islet.

114

### 115 ***Robo* $\beta KO$ islets display unsynchronized $Ca^{2+}$ oscillations *in vivo***

116 To investigate how the reduced homotypic  $\beta$  cell- $\beta$  cell connections in *Robo*  $\beta KO$  islets  
117 affects insulin-secretion dynamics, we adopted a novel intravital  $Ca^{2+}$  imaging method which  
118 enables imaging of islet  $Ca^{2+}$  dynamics *in situ* within the intact pancreas<sup>33</sup>. In brief, this method  
119 employs an intravital microscopy (IVM) platform and adeno-associated viral (AAV) delivery of  
120 insulin promoter-driven GCaMP6s, a fluorescent  $Ca^{2+}$  biosensor, to quantitate  $\beta$  cell  $Ca^{2+}$   
121 dynamics *in vivo* in both *Robo*  $\beta KO$  and control islets. This method thus allows for retention of

122 the islet's *in vivo* microenvironment, blood flow, and innervation, and provides more realistic  
123 conditions than *in vitro* approaches allow for.

124 We verified that synchronous  $\text{Ca}^{2+}$  oscillations are maintained *in vivo* in islets by  
125 measuring GCaMP6s intensity of  $\beta$  cells within AAV8-RIP-GCaMP6 infected islets of control  
126 (*Robo WT*) mice (**Figure 2**). As expected, control mice displayed whole islet synchronous  $\text{Ca}^{2+}$   
127 oscillations for at least 10 minutes after glucose elevation ( $n=3$  islets from 1 mouse; **Figure 2**  
128 and **Supplemental Video 1**). We quantified the degree to which these oscillations are  
129 synchronous within the islet by analyzing the amount of correlation between GCaMP6s active  
130 areas within individual islets. While oscillations vary in frequency between islets, the degree of  
131 correlation between  $\beta$  cells within any one islet is very high, confirming that control islets  
132 possess highly synchronous intra-islet  $\text{Ca}^{2+}$  oscillation *in vivo* (fraction of GCaMP6s activity with  
133 correlated  $\text{Ca}^{2+}$  oscillations= $0.97\pm 0.005$ ,  $n=3$  islets from 1 mouse; see Figure 4A).

134 Conversely, we found that most *Robo  $\beta$ KO* islets display asynchronous intra-islet  $\text{Ca}^{2+}$   
135 oscillations *in vivo* (**Figure 3, Supplemental Figure 2, Supplemental Videos 2 and 3**).  
136 Quantification of this asynchronous behavior through correlation analysis of GCaMP6s activity  
137 within individual *Robo  $\beta$ KO* islets revealed significant reduction in intra-islet correlated  
138 oscillation areas compared to controls (fraction of GCaMP6s activity with correlated  $\text{Ca}^{2+}$   
139 oscillations= $0.62\pm 0.1$ ,  $n=8$  islets from 4 mice,  $p<0.01$ ; **Figure 4A**). Further, asynchronous *Robo*  
140  *$\beta$ KO* islets showed spatially distinct areas within the islet that oscillated synchronously with  
141 immediate  $\beta$  cell neighbors but not with more distant regions within the same islet (**Figure 3C-**  
142 **D, and Supplemental Figure 2**). This was not due to differences in the proportion of GCaMP6s  
143 positive cells showing elevated  $\text{Ca}^{2+}$  activity within *Robo  $\beta$ KO* islets compared to controls

144 (control islets  $0.98 \pm 0.008$  fraction active,  $n=3$  islets from 1 mouse; *Robo*  $\beta KO$  islets  $0.96 \pm 0.02$   
145 fraction active,  $n=5$  islets from 3 mice,  $p=0.35$ ; **Figure 4B**).

146 Interestingly, 3 out of the 8 *Robo*  $\beta KO$  islets imaged showed synchronous  $Ca^{2+}$  activity in  
147 greater than 90% of GCaMP6s positive areas (**Figure 4A, Supplemental Figure 3 and**  
148 **Supplemental video 4**). Moreover, upon performing organ clearing and imaging on *Robo*  $\beta KO$   
149 pancreata, we observed multiple islets with relatively few  $\alpha$  cells penetrating the  $\beta$  cell core  
150 (**Figure 5, Supplemental Videos 5 and 6**). It is likely that those *Robo*  $\beta KO$  islets with normal  
151 architecture are the same islets which retain synchronous  $Ca^{2+}$  oscillations. Together, these  
152 observations suggest that some mechanisms governing synchronous  $Ca^{2+}$  oscillations within an  
153 islet are not controlled intrinsically by *Robo* expression within  $\beta$  cells. This fits with the  
154 hypothesis that architecture of the islet itself facilitates synchronous oscillations.

155 Further, analysis of the speed of wave propagation and time lag in the highly correlated  
156 *Robo*  $\beta KO$  islets showed a trend towards a reduction in wave propagation speed (**Figure 4C**) and  
157 an increase in time lag (**Figure 4D**) when compared to controls, though these failed to reach the  
158 threshold for statistical significance (control islets wave propagation:  $119.5 \pm 49.13 \mu m/sec$ ,  $n=3$   
159 islets from 1 mouse; *Robo*  $\beta KO$  islets wave propagation:  $38.67 \pm 16.6 \mu m/sec$ ,  $n=3$ ,  $p=0.1940$ ;  
160 control islets phase lag:  $0.057 sec \pm 0.005$ ,  $n=3$  islets from 1 mouse; *Robo*  $\beta KO$  islets phase lag:  
161  $0.083 \pm 0.01 sec$ ,  $n=3$ ,  $p=0.0934$ ; **Figure 4C-F**). Islets with sub-optimal coupling have been shown  
162 to display full synchronization in  $Ca^{2+}$  oscillations, but with lower wave velocity<sup>10</sup>. Because there  
163 is a trend toward slower wave velocity, these *Robo*  $\beta KO$  islets may still have sub-optimal  
164 coupling due to architecture changes despite their fully synchronized  $Ca^{2+}$  oscillations.

165



166 ***Robo*  $\beta$ KO islets retain the ability to form gap junctions and have similar levels of**  
167 **vascularization**

168 Besides a decrease in  $\beta$  cell- $\beta$  cell homotypic contacts within the islet, a possible  
169 explanation for the loss of synchronized whole islet  $\text{Ca}^{2+}$  oscillations in *Robo*  $\beta$ KO islets is that  $\beta$   
170 cells in *Robo*  $\beta$ KO islets no longer possess the gap junctions necessary for adequate electrical  
171 coupling. Indeed, the phenotype described above is reminiscent of that observed in mice  
172 heterozygous for a *Cx36* null allele<sup>10,34</sup>. To test whether *Robo*  $\beta$ KO mice form fewer gap  
173 junctions between  $\beta$  cells, we measured the area of Cx36 protein immunofluorescence  
174 normalized to islet area in *Robo*  $\beta$ KO and control islets (**Figure 6**). We observed no difference in  
175 Cx36 immunofluorescence between *Robo*  $\beta$ KO islets and controls (**Figure 6B**), suggesting that  
176 loss of synchronous intra-islet  $\text{Ca}^{2+}$  oscillations is not due to failure of gap junction formation in  
177  $\beta$  cells (control islets:  $0.01 \pm 0.002$  Cx36 signal/ $\mu\text{m}^2$ , *Robo*  $\beta$ KO islets:  $0.01 \pm 0.001$  Cx36  
178 signal/ $\mu\text{m}^2$ ,  $n=10-15$ ,  $p=0.17$  islets from 4 mice of each group).

179 Another possible explanation for the observed uncoupling of intra-islet  $\text{Ca}^{2+}$  oscillations  
180 in *Robo*  $\beta$ KO islets is that  $\beta$  cell- $\beta$  cell contact in *Robo*  $\beta$ KO is disrupted due to physical blocking  
181 by non-endocrine tissue. To determine if other non-endocrine architectural changes within the  
182 islet occur in *Robo*  $\beta$ KO mice we quantified the amount of matrix components secreted by  
183 vessels as a surrogate for vasculature (laminin, and collagen IV) in *Robo*  $\beta$ KO and control islets.  
184 In all cases we found no significant difference in area of vessel matrix components (**Figure 7**)  
185 between *Robo*  $\beta$ KO and control islets, suggesting that interfering blood vessels are likely not the  
186 cause of loss of whole islet synchronous  $\text{Ca}^{2+}$  oscillations (normalized laminin  $\beta$ 1 area: control  
187  $0.3126 \pm 0.05$   $\mu\text{m}^2$ ,  $n=10-12$  islets from 8 mice; *Robo*  $\beta$ KO  $0.3747 \pm 0.05$   $\mu\text{m}^2$ ,  $n=10-12$  islets from 8

188 mice;  $p = 0.3908$ ; normalized Col IV area: control  $0.1812 \pm 0.01 \mu\text{m}^2$ ,  $n = 10-12$  islets from 4 mice;  
189 *Robo*  $\beta\text{KO}$   $0.156 \pm 0.019$ ,  $p = 0.35$ ).

190

## 191 Discussion

192 In this study, we provide evidence for the importance of islet architecture for proper  
193 islet function *in vivo*. When islet architecture is disrupted while  $\beta$  cell maturity is retained in  
194 *Robo*  $\beta\text{KO}$  mice, synchronized  $\text{Ca}^{2+}$  oscillations are perturbed in the *in vivo* islet. This is not due  
195 to loss of Cx36, or change in amount of islet vascularization. *Robo*  $\beta\text{KO}$   $\beta$  cells possess fewer  
196 homotypic nearest neighbors than controls, suggesting a limited capacity to electrically couple  
197  $\beta$  cells across the islet. Taken together, these data indicate that islet architecture itself,  
198 uncoupled from  $\beta$  cell maturity or availability of gap junction machinery is important for  
199 coordinated insulin secretion between  $\beta$  cells.

200 *Robo*, and its ligand Slit, have been previously shown to affect  $\text{Ca}^{2+}$  oscillations in  $\beta$  cell  
201 *in vitro*<sup>35</sup>. However, while it is possible that intrinsic  $\beta$  cell factors rather than the disrupted islet  
202 architecture alone contribute to disruption of synchronized  $\text{Ca}^{2+}$  oscillations in *Robo*  $\beta\text{KO}$  islets  
203 in our experiments, this is not likely the driving force. If this was the case, then we would expect  
204 a highly penetrant asynchronous oscillation phenotype in *Robo*  $\beta\text{KO}$  islets, yet more than one-  
205 third of *Robo*  $\beta\text{KO}$  islets analyzed showed highly synchronized  $\text{Ca}^{2+}$  oscillations. Instead, these  
206 results suggest that deletion of *Robo* alone in  $\beta$  cells is not sufficient to abolish synchronicity.  
207 Moreover, *Robo*  $\beta\text{KO}$  islets show a heterogeneous spectrum of disrupted architecture within  
208 the same animal, with some islets displaying severe endocrine cell type intermixing while  
209 others retain relatively normal architecture. Thus it is likely that islets with relatively normal

210 architecture correspond to the islets that display more synchronous  $\text{Ca}^{2+}$  oscillations. Moreover  
211 phenotypic heterogeneity is likely not due to an incomplete deletion of *Robo* in a subset of  
212 islets. This is evident by the fact the islets were detected during the  $\text{Ca}^{2+}$  imaging experiment by  
213 the fluorescent labeling of  $\beta$  cells with the H2B-mCherry lineage-tracing reporter<sup>31</sup>, which uses  
214 the same Cre that is used to delete *Robo* in those  $\beta$  cells. Thus expression of H2B-mCherry  
215 precludes inefficient Cre expression and recombination.

216 It also remains possible that other components of islet architecture besides endocrine  
217 cell type sorting contribute to disruption in  $\text{Ca}^{2+}$  oscillations found in *Robo*  $\beta\text{KO}$  islets.  
218 Specifically, while we have shown that the amount of vascularization between *Robo*  $\beta\text{KO}$  islets  
219 and controls is similar, we cannot draw conclusions on whether the pattern of vessels is  
220 unchanged. Further, it is possible that amount and patterning of innervation may vary between  
221 *Robo*  $\beta\text{KO}$  and controls. This is particularly of interest because *Robo* has known roles in  
222 angiogenesis and axon guidance, and thus could affect precisely how the islet is innervated and  
223 vascularized<sup>36</sup>.

224 Finally, our results may have implications towards directing islet architecture in the  
225 pursuit of generating *bona fide* islets from stem cells *in vitro* for the treatment of diabetics.  
226 Thus far, most efforts to create such stem cell derived islets have focused on creating  
227 homogenous functionally mature  $\beta$  cells<sup>37</sup>. Such efforts have been largely successful in terms of  
228 creating  $\beta$  cells that display insulin secretory profiles close to those of primary  $\beta$  cells<sup>38</sup>. Yet  
229 despite their seeming resemblance to mature native  $\beta$  cells, islets made from stem cell-derived  
230  $\beta$  cells fail to fully match the function of isolated primary islets<sup>37,38</sup>. This has been partially  
231 attributed to the fact that stem cell derived islets formed *in vitro* thus far have been simply

232 clusters of homogenous  $\beta$  cells, rather than an organized heterogeneous population of  $\beta$  cells  
233 and other islet cell types<sup>37</sup>. Because of the importance of heterogeneous cell types in  
234 controlling glucose homeostasis, it has become evident that achieving correct  $\beta$  cell  
235 heterogeneity is needed to generate better islets *in vitro*<sup>39</sup>. However, it is likely that addition of  
236 these cells without recapitulation of islet architecture will not generate islets with optimum  
237 function and  $\beta$  cell coupling.

238 **Acknowledgments**

239 We Kurt Weiss and Jan Huisken for help with imaging. We thank members of the Blum lab,  
240 especially Jennifer Gilbert and Bayley Waters, for valuable discussion. We are also grateful to  
241 Nadav Sharon and Danny Ben-Zvi for critically reading the manuscript. This work was funded in  
242 part by the following grants. R01DK121706, the DRC at Washington University Pilot Grant  
243 P30DK020579, and Pilot Award UL1TR000427 from the UW-Madison Institute for Clinical and  
244 Translational Research (ICTR) to BB; R01DK060581 to RM; R01DK102950 and R01DK106412 to  
245 RKP; R01CA216248 to SP; R01DK113103, R01AG062328, ADA 1-16-IBS-212 to MM, and an  
246 award from the Wisconsin Partnership Program to BB and MM. MTA was funded by  
247 5T32GM007133-44 and a graduate training award from the UW-Madison Stem Cell &  
248 Regenerative Medicine Center. We also thank the University of Wisconsin Carbone Cancer  
249 Center Support Grant P30CA014520 for use of the UW Flow Core, and the University of  
250 Wisconsin, Madison Biotechnology Center for sequencing and analysis.

251

252 **Author Contribution**

253 Conceptualization, B.B. and M.T.A.; Methodology, B.B., M.T.A., C.A.R, and J.M.D.; Investigation,  
254 M.T.A., C.A.R, J.M.S, M.R.L, S.M.S, and S.D.N; Formal Analysis, M.T.A., C.A.R, M.R.L., and J.M.D.;  
255 Resources, S.M.P, R.G.M, A.K.L, M.J.M. and R.K.P.B.; Writing Original Draft, B.B and M.T.A.;  
256 Writing, Review and Editing, all authors; Funding Acquisition, B.B., S.M.P, M.J.M, R.K.P.B.,  
257 R.G.M., and A.K.L; Supervision, B.B.

## 258 **Materials and Methods**

### 259 **Animals**

260 The experimental protocol for animal usage was reviewed and approved by the University of  
261 Wisconsin-Madison Institutional Animal Care and Use Committee (IACUC) under Protocol  
262 #M005221 and Protocol #M005333, and all animal experiments were conducted in accordance  
263 with the University of Wisconsin-Madison IACUC guidelines under the approved  
264 protocol. *Robo1<sup>Δ</sup>,2<sup>flx40</sup>*, *Ins1-Cre<sup>41</sup>*, *Urocortin3-Cre<sup>42</sup>* and *Rosa26-Lox-Stop-Lox-H2BmCherry<sup>43</sup>*  
265 mice were previously described. All mouse strains were maintained on a mixed genetic  
266 background. Control colony mates in all analyses were *Robo<sup>+/+</sup>* with the either *Ins1-Cre* or *Ucn3-*  
267 *Cre*.

268

### 269 **Immunofluorescence**

270 Pancreata were fixed with 4% PFA at 4°C for 3h, embedded in 30% sucrose and frozen in OCT  
271 (Tissue-Tek). Pancreatic sections (10 μm) were stained using a standard protocol. The following  
272 primary antibodies and dilutions were used: guinea pig anti-Insulin (1:6, Dako, IR00261-2),  
273 mouse anti-Glucagon (1:500, Sigma G2654), rabbit anti-Glucagon (1:200, Cell Signaling 2760S),  
274 rabbit anti-Somatostatin (1:1000, Phoenix G-060-03), rabbit anti-Connexin36 (1:80, Invitrogen  
275 36-4600), rabbit anti-Col IV (1:300, Abcam Ab656), rat anti-Laminin β1 (1:500, Invitrogen MA5-  
276 14657). The following secondary antibodies were used at 1:500: Donkey anti-Guinea Pig 594  
277 (Jackson), Donkey anti-Guinea Pig 647 (Jackson), Donkey anti-Rabbit 488 (Invitrogen), Donkey  
278 anti-Rabbit 594 (Invitrogen), Donkey anti-goat 647 (Invitrogen), and Donkey anti-rat 488

279 (Invitrogen). Slides were imaged using a Leica SP8 Scanning Confocal microscope or a Zeiss Axio  
280 Observer.Z1 microscope.

281

## 282 **RNA sequencing**

283 RNA was isolated from FACS sorted lineage-traced  $\beta$  cells<sup>31</sup> from control and *Robo*  $\beta$ KO mice  
284 using phenol chloroform extraction (TRIzol). DNA libraries were generated using Takara's  
285 SMART-Seq v4 Low Input RNA Kit for Sequencing (Takara, Mountain View, California, USA) for  
286 cDNA synthesis and the Illumina NexteraXT DNA Library Preparation (Illumina, San Diego, CA,  
287 USA) kit for cDNA dual indexing. Full length cDNA fragments were generated from 1-10ng total  
288 RNA by SMART (Switching Mechanism at 5' End of RNA Template) technology. cDNA fragments  
289 were fragmented and dual indexed in a single step using the Nextera kit's simultaneous  
290 transposon and tagmentation step. Quality and quantity of completed libraries were assessed  
291 using Agilent DNA series chip assay (Agilent Technologies, Santa Clara, CA) and Invitrogen Qubit  
292 ds DNA HS Kit (Invitrogen, Carlsbad, California, USA), respectively. Each library was standardized  
293 to 2nM. Cluster generation was performed on Illumina cBot, with libraries multiplexed for  
294 1x100bp sequencing using TruSeq 100bp SBS kit (v4) on an Illumina HiSeq2500. Images were  
295 analyzed using standard Illumina Pipeline, version 1.8.2.

296

## 297 **Intravital Imaging**

298 Mouse pancreata were exposed in anesthetized mice by making a small incision on the right  
299 side of the mouse, and externalizing the tip of the pancreas. A glass dish was placed over the  
300 exposed pancreas and the mouse was placed on a microscope stage with isoflurane anesthesia

301 for the remainder of imaging. Islets were identified on the surface of the pancreas by detecting  
302 Histone H2BmCherry fluorescent nuclei labeled by  $\beta$  cell-specific lineage-tracing reporter<sup>31</sup>.  
303 Once islets were identified, mice were given injections of 1g/kg body weight glucose (30% in  
304 saline) intraperitoneally. Blood glucose levels were monitored through tail vein bleeds. Once  
305 the blood glucose reached  $\sim$ 300 mg/dL, GCaMP6s activity was identified using the microscope  
306 eye piece. When imaging a time course of GCaMP6s intensity, a z-stack was set to 8 or 12 slices  
307 each 8 $\mu$ m apart. Images were captured every 10 or 30 seconds respectively over 10 minutes at  
308 a resolution of 512x512 pixels. After time courses were recorded, high resolution image z-stacks  
309 were taken with 60 z planes taken 1 $\mu$ m apart or 8 z-planes taken 8 $\mu$ m apart at 1024x1024 pixel  
310 resolution. For some images, rhodamine-dextran was injected retro-orbitally to mark the  
311 vasculature of the islets *in vivo*.

312

### 313 **Gap junction and vasculature quantification**

314 Cx36 levels were quantified from images of islets co-stained with rabbit anti-Cx36 (Invitrogen)  
315 and Guinea Pig anti-insulin antibody. Vasculature levels were quantified from images co-stained  
316 with rat anti-Laminin  $\beta$ 1 or rabbit anti-col IV and guinea pig anti-insulin. 8 Z-planes were taken  
317 1 $\mu$ m apart on a Leica SP8 Scanning Confocal microscope using a 40x oil immersion objective  
318 (Cx36) or 20X (vasculature). Threshold masks were made of both channels for each islets, and  
319 the area of each staining was measured using FIJI's analyze particles functions. The area of gap  
320 junctions, blood vessels (marked by their respective antibody) was divided by the area of insulin  
321 for each islet. 10-14 islets were analyzed for  $n=2-8$  mice for each genotype. Student's T-test was  
322 performed to obtain *P* values.



323

### 324 **Nearest Neighbor Analysis**

325  $\beta$  cells were identified using the lineage tracer *Rosa26-Lox-Stop-Lox-H2BmCherry* crossed to  
326 *Ucn3-Cre* and tissue sections were stained with antibodies against glucagon and somatostatin  
327 to identify  $\alpha$  and  $\delta$  cells respectively. The 3D Tissue Spatial Analysis Toolbox for Fiji<sup>44</sup> was used  
328 to identify specific cell types using the above markers and to calculate the number of cell type  
329 specific nearest neighbors from all identified endocrine cells. Analysis was performed on 9-11  
330 islets from  $n=3$  mice from each genotype.

331

### 332 **Whole Organ Clearing and Imaging**

333 Pancreata were fixed in 4% PFA for 3 hours at room temperature, then dehydrated stepwise in  
334 methanol (33, 66%, and 100%) for 15 mins each step. Samples were then bleached using  
335 MeOH:H<sub>2</sub>O<sub>2</sub>:DMSO bleaching buffer in a 2:1:3 ratio at RT for 24 hr, and then stored in methanol  
336 overnight. Next, Samples were freeze-thawed for at least 5 cycles of 24 hour freeze then 2 hour  
337 thaw in -80°C-RT to facilitate antibody penetration. Samples were then rehydrated stepwise  
338 back to TBST (33%, 66%, 100%), at least 15 min/step, reducing the MeOH during each step.  
339 Samples were then blocked in TBST with 10% donkey serum, 5% DMSO and 0.01% NaAz for 12-  
340 24 hr at RT. Samples were then incubated with primary antibodies (Dako guinea pig anti-Insulin  
341 and CST Rabbit anti-glucagon) in blocking buffer for 48 hr- 72 hr, then washed overnight in  
342 TBST. Following wash, samples were incubated with secondary antibodies (594 anti-glucagon  
343 and 647 anti-insulin) for 48-72 hr at RT, then washed overnight in TBST. Whole pancreata were  
344 then mounted in low melting temp agarose for imaging. Whole pancreata were imaged using a

345 custom light sheet microscope. 2D images were collected in a 3 mm x 5 mm field of view every  
346 10 um over a 5 mm volume to generate the 3D reconstruction. Imaris was used to assign  
347 surface volumes to pancreas morphology, insulin surfaces, and glucagon surfaces by intensity  
348 thresholding.

349

### 350 **Time Course Image Analysis**

351 All images were analyzed using previously published methods<sup>45</sup> with custom Matlab  
352 (Mathworks) scripts. For activity analysis, images were smoothed using a 5x5 pixel averaging  
353 filter. Areas without significant fluorescence were removed. Saturated areas were also removed  
354 by limiting the area to intensity below the maximum value. Photobleaching was adjusted for by  
355 removing any linear trend. Any islets with significant motion artifacts were removed or time  
356 courses were shortened to the time over which no significant movement occurred  
357 (displacement of <0.5 cell width). For the time course of each pixel in the image with significant  
358 fluorescence, a peak detection algorithm was used to determine if the areas had peak  
359 amplitudes significantly above background. A region was considered “active” if the  
360 corresponding time course for each pixel had a peak amplitude >2.4x background. The fraction  
361 of active area was calculated as the number of pixels detected as “active” across all z-planes,  
362 normalized to the total number of pixels that showed significant fluorescence across all z-  
363 planes that were not saturated. Islets with significant background fluorescence from spectral  
364 overlap of channels were excluded from activity analysis because “inactive” cells were  
365 indistinguishable from background and therefore total islet area could not be accurately  
366 calculated. Coordination was determined based on coincident timing of identified peaks, where

367 areas were segmented by identified peaks occurring at similar time points. The cross  
368 correlation of the time courses for two 5x5 pixel subregion was taken. If the correlation  
369 coefficient was >0.75, then the two subregions were considered highly coordinated and merged  
370 into a larger region. The coordinated area was calculated as the number of pixels in the largest  
371 area of coordination across all z-planes normalized to the total number of pixels of the islet that  
372 were determined to be 'active' for all planes. This analysis is based on previous analysis<sup>45</sup>, but  
373 adjusted for 3-dimensional data. Phase lag and wave propagation speed was determined as  
374 in<sup>10</sup>, where 2 regions were chosen manually within a coordinated area within the same z-plane.  
375 The phase lag of these regions was calculated from a Fourier transform of each time course.  
376 First the peak frequency was identified from the power spectrum, as generated from a Fourier  
377 transform of each time course. At each peak frequency the phase was then calculated. The  
378 phase lag was calculated from the difference in phase between each region, and converted into  
379 a time lag according to  $(dt=(1/f)*\tan^{-1}(\varphi_1-\varphi_2))$ , where  $\varphi_1-\varphi_2$  is the phase difference, and  $f$  is  
380 the sampling frequency of the time courses analyzed. Speed was calculated by dividing the  
381 distance between the two regions by the time lag. For phase and speed analysis only islets with  
382 >90% coordinated area was used. All statistical analysis was performed in Prism (Graphpad) or  
383 Matlab. First a F-test was used to determine if variances were equal then a Student's t-test or  
384 Welch t-test (for unequal variance) were utilized for determining whether activity,  
385 coordination, phase lag and speed were significantly different.  $p<0.05$  was considered  
386 significant.

387 **Figure Legends**

388 **Figure 1: *Robo*  $\beta$ KO islets have fewer homotypic nearest neighbors than controls (A)**

389 Immunofluorescence images (left and middle panels) and cell connectivity maps generated by  
390 nearest neighbor analysis (right panels) of control and *Robo*  $\beta$ KO islets.  $\beta$  cells (red),  $\alpha$  cells  
391 (green), and  $\delta$  cells (blue) are denoted by nodes on the connectivity maps. A line the same color  
392 as both nodes it connects denotes a homotypic interaction of that corresponding cell type. A  
393 white line connecting two nodes denotes a heterotypic interaction between cell types. (B)  
394 Probability of any homotypic cell-cell contact in *Robo*  $\beta$ KO islets vs controls ( $n=9-11$  islets for 3  
395 mice from each genotype; control 83.7%, *Robo*  $\beta$ KO 64.43%,  $p$  0.0008). (C) Probability of  $\beta$  cell-  
396  $\beta$  cell contacts in *Robo*  $\beta$ KO islets vs. controls ( $n=9-11$  islets for 3 mice from each genotype;  
397 control 75.35%, *Robo*  $\beta$ KO 50.37%,  $p=0.01$ ). (D) Probability of any heterotypic cell-cell contact in  
398 *Robo*  $\beta$ KO islets vs. controls ( $n= 9-11$  islets for 3 mice from each genotype; control 16.3%, *Robo*  
399  $\beta$ KO 35.57%,  $p=0.0008$  (E). Probability of  $\beta$  cell-  $\alpha$  cell contacts in *Robo*  $\beta$ KO islets vs controls  
400 ( $n=9-11$  islets for 3 mice from each genotype; control 11.21%, *Robo*  $\beta$ KO 25.99%,  $p=0.02$ ). (B-E  
401 Similar shaded points in graphs indicate islets from the same mouse).

402

403 **Figure 2: Control islets show highly synchronized whole islet  $\text{Ca}^{2+}$  oscillations (A) High**

404 resolution maximum intensity projection of a control islet *in vivo* in an *AAV8-RIP-GCaMP6s*-  
405 injected mouse showing GCaMP6s in green, nuclear mCherry  $\beta$  cell lineage-tracing in red, and  
406 collagen (second-harmonic fluorescence) in blue. (B) Stills over one oscillation period from  
407 control islet in supplementary video 1, starting after blood glucose level reached  $\sim 300$  mg/dL  
408 from IP glucose injection. Video was recorded for 10 minutes with frames taken every 10

409 seconds. (C) Representative time courses of  $\text{Ca}^{2+}$  activity in 4 individual areas from control islet  
410 in supplementary video 1 showing correlation over 98% of the active islet area. Time courses  
411 are normalized to average fluorescence of individual area over time. Similar color indicates that  
412 the time courses have a Pearson's correlation coefficient of  $\geq 0.75$  and matches the region of  
413 coordination that is seen in D. (D) False color map of top five largest coordinated areas across z-  
414 stack of control islet from analysis in C. Areas in grey are not coordinated. The color represents  
415 a region of coordination with Pearson's Correlation Coefficient  $\geq 0.75$  of GCaMP6s activity. Cells  
416 used in time courses in C are labeled.

417

418 **Figure 3: *Robo*  $\beta$ KO islets show uncoordinated whole islet  $\text{Ca}^{2+}$  oscillations** (A) High resolution  
419 maximum intensity projection of a *Robo*  $\beta$ KO islet *in vivo* in an AAV8-RIP-GCaMP6s-injected  
420 mouse showing GCaMP6s in green, nuclear mCherry  $\beta$  cell lineage tracing in red, and collagen in  
421 blue. (B) Stills over one oscillation period from *Robo*  $\beta$ KO islet in supplementary video 2,  
422 starting after blood glucose level reached  $\sim 300$  mg/dL from IP glucose injection. Video was  
423 recorded for 10 minutes with frames taken every 30 seconds. (C) Representative time courses  
424 of  $\text{Ca}^{2+}$  activity in 4 individual areas from *Robo*  $\beta$ KO islet in supplementary video 2, showing  
425 correlation of 43.6% of the active islet area. Time courses are normalized to average  
426 fluorescence of individual area over time. Similar color indicates that the time courses have a  
427 Pearson's correlation coefficient of  $\geq 0.75$  and matches the region of coordination that is seen in  
428 D. (D) False color map of top five largest coordinated areas across z-stack of *Robo*  $\beta$ KO islet  
429 from analysis in C. Areas in grey are not coordinated. The color represents a region of

430 coordination with Pearson's Correlation Coefficient  $\geq 0.75$  of GCaMP6s activity. Cells used in  
431 time courses in C are labeled.

432

433 **Figure 4: Quantification of *Robo*  $\beta$ KO  $Ca^{2+}$  oscillation phenotype** (A) Largest fraction of area in  
434 islet exhibiting coordinated  $Ca^{2+}$  oscillations for control and *Robo*  $\beta$ KO islets. (B) Fraction of  
435 active islet area showing elevated  $Ca^{2+}$  activity for control and *Robo*  $\beta$ KO islets. (C) Phase lag of  
436 islet from control and *Robo*  $\beta$ KO islets. Only islets with large coordination across islet ( $>90\%$   
437 coordinated area) were used. (D) Speed across islets from control and *Robo*  $\beta$ KO islets. Only  
438 islets with large coordination across islet ( $>90\%$  coordinated area) were used. (E) Close up of  
439 time-courses from islet in Figure 2, showing representative phase lag of  $Ca^{2+}$  waves of 2 cells in  
440 the same z-plane. (F) Same as C but for Supplemental Figure 3.

441

442 **Figure 5: *Robo*  $\beta$ KO islets show heterogeneity in severity of architectural disruption** (A) Space  
443 filling models generated from cleared 3x5mm sections of pancreatic tissue from control and  
444 *Robo*  $\beta$ KO mice with insulin in red, glucagon in green, and auto-fluorescent surrounding tissue  
445 in blue. Projections show surface views of islets with insulin channel shown as transparent in  
446 order to visualize  $\alpha$  cells on the adjacent side and the interior of the islet. (B) Close ups from  
447 portions of the pancreatic tissue showing heterogeneity in architectural phenotype in *Robo*  $\beta$ KO  
448 and number of  $\alpha$  cells present in both control and *Robo*  $\beta$ KO.

449

450 **Figure 6: Amount of Cx36 gap junctions remains unchanged in *Robo*  $\beta$ KO** (A)  
451 Immunofluorescent images showing Cx36 (gray or green) and insulin (red) in *Robo*  $\beta$ KO and

452 control islets. (B) Quantification of area of Cx36 staining normalized to islet area in *Robo*  $\beta$ *KO*  
453 islets and controls showing no significant difference ( $n=10-12$  islets for 4 mice per group,  
454  $p=0.17$ ).

455

456 **Figure 7: Amount of vascularization remains unchanged in *Robo*  $\beta$ *KO* islets** (A) Representative  
457 immunofluorescent staining of basement membrane marking vasculature (laminin and collagen  
458 IV) showing similar amounts in *Robo*  $\beta$ *KO* and control islets (B) Quantification of area of staining  
459 normalized to islet area showing no difference in amounts of basement membrane marking  
460 blood vessels in *Robo*  $\beta$ *KO* compared to control islets.

461 **Supplemental Figures**

462 **Supplemental Video 1: Control islets show highly synchronized  $\text{Ca}^{2+}$  oscillations.** Intravital time  
463 course video of an islet within the *in vivo* pancreas of a control  $\beta$  cell lineage traced mouse  
464 infected with *AAV8-Ins1-GCaMP6s*. Lineage traced  $\beta$  cells are marked by mCherry in red and  
465 GCaMP6s is shown in green. Mouse was injected IP with glucose, and video was recorded once  
466 blood glucose levels reached  $\sim 300$  mg/dL. Images were taken every 10 seconds through a Z-  
467 stack of 8 slices each  $8\mu\text{m}$  apart, over 10 minutes. Scale bar is  $100\mu\text{m}$ . Time stamp shown in in  
468 upper left corner shows time of image in min:sec.

469

470 **Supplemental Video 2: *Robo*  $\beta\text{KO}$  islets show unsynchronized  $\text{Ca}^{2+}$  oscillations.** Intravital time  
471 course video of an islet within the *in vivo* pancreas of a *Robo*  $\beta\text{KO}$   $\beta$  cell lineage traced mouse  
472 infected with *AAV8-Ins1-GCaMP6s*, and retro-orbitally injected with rhodamine-dextran to  
473 mark vasculature. Lineage traced  $\beta$  cells are marked by mCherry in red and GCaMP6s is shown  
474 in green, and vasculature is shown in yellow. Mouse was injected IP with glucose, and video  
475 was recorded once blood glucose levels reached  $\sim 300$  mg/dL. Images were taken every 30  
476 seconds through a Z-stack of 12 slices each  $8\mu\text{m}$  apart, over 10 minutes. Scale bar is  $100\mu\text{m}$ .  
477 Time stamp shown in in upper left corner shows time of image in min:sec.

478

479 **Supplemental Video 3: Most *Robo*  $\beta\text{KO}$  islets show unsynchronized  $\text{Ca}^{2+}$  oscillations.** Intravital  
480 time course video of an islet within the *in vivo* pancreas of a *Robo*  $\beta\text{KO}$   $\beta$  cell lineage traced  
481 mouse infected with *AAV8-Ins1-GCaMP6s*. Lineage traced  $\beta$  cells are marked by mCherry in red  
482 and GCaMP6s is shown in green. Mouse was injected IP with glucose, and video was recorded



483 once blood glucose levels reached ~300 mg/dL. Images were taken every 10 seconds through a  
484 Z-stack of 8 slices each 8 $\mu$ m apart, over 10 minutes. Scale bar is 100 $\mu$ m. Time stamp shown in in  
485 upper left corner shows time of image in min:sec.

486

487 **Supplemental Video 4: A subset of *Robo*  $\beta$ KO islets retain synchronized  $Ca^{2+}$  oscillations.**

488 Intravital time course video of an islet within the *in vivo* pancreas of a *Robo*  $\beta$ KO  $\beta$  cell lineage  
489 traced mouse infected with AAV8-Ins1-GCaMP6s. Lineage traced  $\beta$  cells are marked by mCherry  
490 in red and GCaMP6s is shown in green. Mouse was injected IP with glucose, and video was  
491 recorded once blood glucose levels reached ~300 mg/dL. Images were taken every 10 seconds  
492 through a Z-stack of 8 slices each 8 $\mu$ m apart, over 10 minutes. Scale bar is 100 $\mu$ m. Time stamp  
493 shown in in upper left corner shows time of image in min:sec.

494

495 **Supplemental Figure 1: *Robo*  $\beta$ KO islets retain  $\beta$  cell differentiation and maturity markers**

496 Volcano plot of differential gene expression from bulk RNA sequencing on lineage traced FACS  
497 sorted  $\beta$  cells from *Robo*  $\beta$ KO and control mice showing no significant differential gene  
498 expression of markers ( $n=2$  mice from each group).

499

500 **Supplemental Figure 2: *Robo*  $\beta$ KO islets show uncoordinated whole islet  $Ca^{2+}$  oscillations (A)**

501 High resolution maximum intensity projection of a *Robo*  $\beta$ KO islet *in vivo* in an AAV8-RIP-  
502 GCaMP6s-injected mouse showing GCaMP6s in green, nuclear mCherry  $\beta$  cell lineage-tracing in  
503 red, and collagen (second-harmonic fluorescence) in blue. (B) Stills over one oscillation period  
504 from *Robo*  $\beta$ KO islet in supplemental video 2, starting after blood glucose level reached ~300

505 mg/dL from IP glucose injection. Video was recorded for 10 minutes with frames taken every 10  
506 seconds. (C) Representative time courses of  $\text{Ca}^{2+}$  activity in 4 individual areas from *Robo*  $\beta$ KO  
507 islet in supplementary video 3, showing correlation of 50% of the active islet area. Time courses  
508 are normalized to average fluorescence of individual area over time. Similar color indicates that  
509 the time courses have a Pearson's correlation coefficient of  $\geq 0.75$  and matches the region of coordination that is seen in D. (D) False color  
510 map of top five largest coordinated areas across z-stack of *Robo*  $\beta$ KO islet from analysis in C.  
511 Areas in grey are not coordinated. The color represents a region of coordination with Pearson's  
512 correlation coefficient of  $\geq 0.75$  of GCaMP6s activity.

514

515 **Supplemental Figure 3: A subset of *Robo*  $\beta$ KO islets show coordinated whole islet  $\text{Ca}^{2+}$**   
516 **oscillations** (A) High resolution maximum intensity projection of a *Robo*  $\beta$ KO islet *in vivo* in an  
517 *AAV8-RIP-GCaMP6s*-injected mouse showing GCaMP6s in green, nuclear mCherry  $\beta$  cell lineage  
518 tracing in red, and collagen in blue. (B) Stills over one oscillation period from *Robo*  $\beta$ KO islet in  
519 supplementary video 4, starting after blood glucose level reached  $\sim 300$  mg/dL from IP glucose  
520 injection. Video was recorded for 10 minutes with frames taken every 10 seconds. (C)  
521 Representative time courses of  $\text{Ca}^{2+}$  activity in 4 individual areas from *Robo*  $\beta$ KO islet in  
522 supplementary video 4, showing correlation of 98% of the active islet area. Time courses are  
523 normalized to average fluorescence of individual area over time. Similar color indicates that the  
524 time courses have a Pearson's correlation coefficient of  $\geq 0.75$  and matches the region of  
525 coordination that is seen in D. (D) False color map of top five largest coordinated areas across z-  
526 stack of *Robo*  $\beta$ KO islet from analysis in C. Areas in grey are not coordinated. The color

527 represents a region of coordination with Pearson's correlation coefficient of  $\geq 0.75$  of GCaMP6s  
528 activity.

529

## 530 References

- 531 1 Kim, A. *et al.* Islet architecture: A comparative study. *Islets* **1**, 129-136,  
532 doi:10.4161/isl.1.2.9480 (2009).
- 533 2 Bonner-Weir, S., Sullivan, B. A. & Weir, G. C. Human Islet Morphology Revisited:  
534 Human and Rodent Islets Are Not So Different After All. *The journal of histochemistry*  
535 *and cytochemistry : official journal of the Histochemistry Society* **63**, 604-612,  
536 doi:10.1369/0022155415570969 (2015).
- 537 3 Hoang, D. T. *et al.* A conserved rule for pancreatic islet organization. *PloS one* **9**,  
538 e110384, doi:10.1371/journal.pone.0110384 (2014).
- 539 4 Hraha, T. H., Bernard, A. B., Nguyen, L. M., Anseth, K. S. & Benninger, R. K.  
540 Dimensionality and size scaling of coordinated Ca(2+) dynamics in MIN6 beta-cell  
541 clusters. *Biophysical journal* **106**, 299-309, doi:10.1016/j.bpj.2013.11.026 (2014).
- 542 5 Nittala, A., Ghosh, S. & Wang, X. Investigating the role of islet cytoarchitecture in its  
543 oscillation using a new beta-cell cluster model. *PloS one* **2**, e983,  
544 doi:10.1371/journal.pone.0000983 (2007).
- 545 6 Ammala, C. *et al.* Exocytosis elicited by action potentials and voltage-clamp calcium  
546 currents in individual mouse pancreatic B-cells. *The Journal of physiology* **472**, 665-688,  
547 doi:10.1113/jphysiol.1993.sp019966 (1993).
- 548 7 Ashcroft, F. M. & Rorsman, P. K(ATP) channels and islet hormone secretion: new  
549 insights and controversies. *Nature reviews. Endocrinology* **9**, 660-669,  
550 doi:10.1038/nrendo.2013.166 (2013).
- 551 8 Bertram, R., Sherman, A. & Satin, L. S. Electrical bursting, calcium oscillations, and  
552 synchronization of pancreatic islets. *Advances in experimental medicine and biology* **654**,  
553 261-279, doi:10.1007/978-90-481-3271-3\_12 (2010).
- 554 9 Bertram, R., Satin, L. S. & Sherman, A. S. Closing in on the Mechanisms of Pulsatile  
555 Insulin Secretion. *Diabetes* **67**, 351-359, doi:10.2337/dbi17-0004 (2018).
- 556 10 Benninger, R. K., Zhang, M., Head, W. S., Satin, L. S. & Piston, D. W. Gap junction  
557 coupling and calcium waves in the pancreatic islet. *Biophysical journal* **95**, 5048-5061,  
558 doi:10.1529/biophysj.108.140863 (2008).
- 559 11 Head, W. S. *et al.* Connexin-36 gap junctions regulate in vivo first- and second-phase  
560 insulin secretion dynamics and glucose tolerance in the conscious mouse. *Diabetes* **61**,  
561 1700-1707, doi:10.2337/db11-1312 (2012).
- 562 12 Brereton, M. F., Vergari, E., Zhang, Q. & Clark, A. Alpha-, Delta- and PP-cells: Are  
563 They the Architectural Cornerstones of Islet Structure and Co-ordination? *The journal of*  
564 *histochemistry and cytochemistry : official journal of the Histochemistry Society* **63**, 575-  
565 591, doi:10.1369/0022155415583535 (2015).
- 566 13 Hang, Y. *et al.* The MafA transcription factor becomes essential to islet beta-cells soon  
567 after birth. *Diabetes* **63**, 1994-2005, doi:10.2337/db13-1001 (2014).

- 568 14 Yamagata, K. *et al.* Overexpression of dominant-negative mutant hepatocyte nuclear  
569 factor-1 alpha in pancreatic beta-cells causes abnormal islet architecture with decreased  
570 expression of E-cadherin, reduced beta-cell proliferation, and diabetes. *Diabetes* **51**, 114-  
571 123 (2002).
- 572 15 Gannon, M. *et al.* Persistent expression of HNF6 in islet endocrine cells causes disrupted  
573 islet architecture and loss of beta cell function. *Development* **127**, 2883-2895 (2000).
- 574 16 Gu, C. *et al.* Pancreatic beta cells require NeuroD to achieve and maintain functional  
575 maturity. *Cell metabolism* **11**, 298-310, doi:10.1016/j.cmet.2010.03.006 (2010).
- 576 17 Ahlgren, U., Jonsson, J., Jonsson, L., Simu, K. & Edlund, H. beta-cell-specific  
577 inactivation of the mouse *Ipf1/Pdx1* gene results in loss of the beta-cell phenotype and  
578 maturity onset diabetes. *Genes & development* **12**, 1763-1768 (1998).
- 579 18 Borden, P., Houtz, J., Leach, S. D. & Kuruvilla, R. Sympathetic innervation during  
580 development is necessary for pancreatic islet architecture and functional maturation. *Cell*  
581 *reports* **4**, 287-301, doi:10.1016/j.celrep.2013.06.019 (2013).
- 582 19 Doyle, M. J. & Sussel, L. *Nkx2.2* regulates beta-cell function in the mature islet.  
583 *Diabetes* **56**, 1999-2007, doi:10.2337/db06-1766 (2007).
- 584 20 Sinagoga, K. L. *et al.* Distinct roles for the mTOR pathway in postnatal morphogenesis,  
585 maturation and function of pancreatic islets. *Development* **144**, 2402-2414,  
586 doi:10.1242/dev.146316 (2017).
- 587 21 Huang, C. *et al.* Synaptotagmin 4 Regulates Pancreatic beta Cell Maturation by  
588 Modulating the Ca(2+) Sensitivity of Insulin Secretion Vesicles. *Developmental cell* **45**,  
589 347-361 e345, doi:10.1016/j.devcel.2018.03.013 (2018).
- 590 22 Jimenez-Caliani, A. J. *et al.* alphaE-Catenin Is a Positive Regulator of Pancreatic Islet  
591 Cell Lineage Differentiation. *Cell reports* **20**, 1295-1306,  
592 doi:10.1016/j.celrep.2017.07.035 (2017).
- 593 23 Bastidas-Ponce, A. *et al.* *Foxa2* and *Pdx1* cooperatively regulate postnatal maturation of  
594 pancreatic beta-cells. *Molecular metabolism* **6**, 524-534,  
595 doi:10.1016/j.molmet.2017.03.007 (2017).
- 596 24 Crawford, L. A. *et al.* Connective tissue growth factor (CTGF) inactivation leads to  
597 defects in islet cell lineage allocation and beta-cell proliferation during embryogenesis.  
598 *Mol Endocrinol* **23**, 324-336, doi:10.1210/me.2008-0045 (2009).
- 599 25 Szabat, M. *et al.* Reduced Insulin Production Relieves Endoplasmic Reticulum Stress and  
600 Induces beta Cell Proliferation. *Cell metabolism* **23**, 179-193,  
601 doi:10.1016/j.cmet.2015.10.016 (2016).
- 602 26 Brissova, M. *et al.* Islet microenvironment, modulated by vascular endothelial growth  
603 factor-A signaling, promotes beta cell regeneration. *Cell metabolism* **19**, 498-511,  
604 doi:10.1016/j.cmet.2014.02.001 (2014).
- 605 27 Baetens, D. *et al.* Alteration of islet cell populations in spontaneously diabetic mice.  
606 *Diabetes* **27**, 1-7 (1978).
- 607 28 Starich, G. H., Zafirova, M., Jablenska, R., Petkov, P. & Lardinois, C. K. A  
608 morphological and immunohistochemical investigation of endocrine pancreata from  
609 obese *ob+/ob+* mice. *Acta histochemica* **90**, 93-101, doi:10.1016/S0065-1281(11)80167-  
610 4 (1991).
- 611 29 Kilimnik, G. *et al.* Altered islet composition and disproportionate loss of large islets in  
612 patients with type 2 diabetes. *PloS one* **6**, e27445, doi:10.1371/journal.pone.0027445  
613 (2011).

- 614 30 Nir, T., Melton, D. A. & Dor, Y. Recovery from diabetes in mice by beta cell  
615 regeneration. *The Journal of clinical investigation* **117**, 2553-2561,  
616 doi:10.1172/JCI32959 (2007).
- 617 31 Adams, M. T., Gilbert, J. M., Hinojosa Paiz, J., Bowman, F. M. & Blum, B. Endocrine  
618 cell type sorting and mature architecture in the islets of Langerhans require expression of  
619 Roundabout receptors in beta cells. *Scientific reports* **8**, 10876, doi:10.1038/s41598-018-  
620 29118-x (2018).
- 621 32 Hoang, D. T., Hara, M. & Jo, J. Design Principles of Pancreatic Islets: Glucose-  
622 Dependent Coordination of Hormone Pulses. *PloS one* **11**, e0152446,  
623 doi:10.1371/journal.pone.0152446 (2016).
- 624 33 Reissaus, C. A. *et al.* A Versatile, Portable Intravital Microscopy Platform for Studying  
625 Beta-cell Biology In Vivo. *Scientific reports* **9**, 8449, doi:10.1038/s41598-019-44777-0  
626 (2019).
- 627 34 Ravier, M. A. *et al.* Loss of connexin36 channels alters beta-cell coupling, islet  
628 synchronization of glucose-induced Ca<sup>2+</sup> and insulin oscillations, and basal insulin  
629 release. *Diabetes* **54**, 1798-1807 (2005).
- 630 35 Yang, Y. H., Manning Fox, J. E., Zhang, K. L., MacDonald, P. E. & Johnson, J. D.  
631 Intra-islet SLIT-ROBO signaling is required for beta-cell survival and potentiates insulin  
632 secretion. *Proceedings of the National Academy of Sciences of the United States of*  
633 *America* **110**, 16480-16485, doi:10.1073/pnas.1214312110 (2013).
- 634 36 Blockus, H. & Chedotal, A. Slit-Robo signaling. *Development* **143**, 3037-3044,  
635 doi:10.1242/dev.132829 (2016).
- 636 37 Sneddon, J. B. *et al.* Stem Cell Therapies for Treating Diabetes: Progress and Remaining  
637 Challenges. *Cell stem cell* **22**, 810-823, doi:10.1016/j.stem.2018.05.016 (2018).
- 638 38 Nasteska, D., Vilorio, K., Everett, L. & Hodson, D. J. Informing beta-cell regeneration  
639 strategies using studies of heterogeneity. *Molecular metabolism* **27S**, S49-S59,  
640 doi:10.1016/j.molmet.2019.06.004 (2019).
- 641 39 Roscioni, S. S., Migliorini, A., Gegg, M. & Lickert, H. Impact of islet architecture on  
642 beta-cell heterogeneity, plasticity and function. *Nature reviews. Endocrinology* **12**, 695-  
643 709, doi:10.1038/nrendo.2016.147 (2016).
- 644 40 Branchfield, K. *et al.* Pulmonary neuroendocrine cells function as airway sensors to  
645 control lung immune response. *Science* **351**, 707-710, doi:10.1126/science.aad7969  
646 (2016).
- 647 41 Thorens, B. *et al.* Ins1(Cre) knock-in mice for beta cell-specific gene recombination.  
648 *Diabetologia* **58**, 558-565, doi:10.1007/s00125-014-3468-5 (2015).
- 649 42 van der Meulen, T. *et al.* Virgin Beta Cells Persist throughout Life at a Neogenic Niche  
650 within Pancreatic Islets. *Cell metabolism* **25**, 911-926 e916,  
651 doi:10.1016/j.cmet.2017.03.017 (2017).
- 652 43 Blum, B. *et al.* Reversal of beta cell de-differentiation by a small molecule inhibitor of  
653 the TGFbeta pathway. *eLife* **3**, e02809, doi:10.7554/eLife.02809 (2014).
- 654 44 Tran Thi Nhu, H., Arrojo, E. D. R., Berggren, P. O. & Boudier, T. A novel toolbox to  
655 investigate tissue spatial organization applied to the study of the islets of Langerhans.  
656 *Scientific reports* **7**, 44261, doi:10.1038/srep44261 (2017).
- 657 45 Westacott, M. J. *et al.* Age-Dependent Decline in the Coordinated [Ca(2+)] and Insulin  
658 Secretory Dynamics in Human Pancreatic Islets. *Diabetes* **66**, 2436-2445,  
659 doi:10.2337/db17-0137 (2017).

# Figure 1

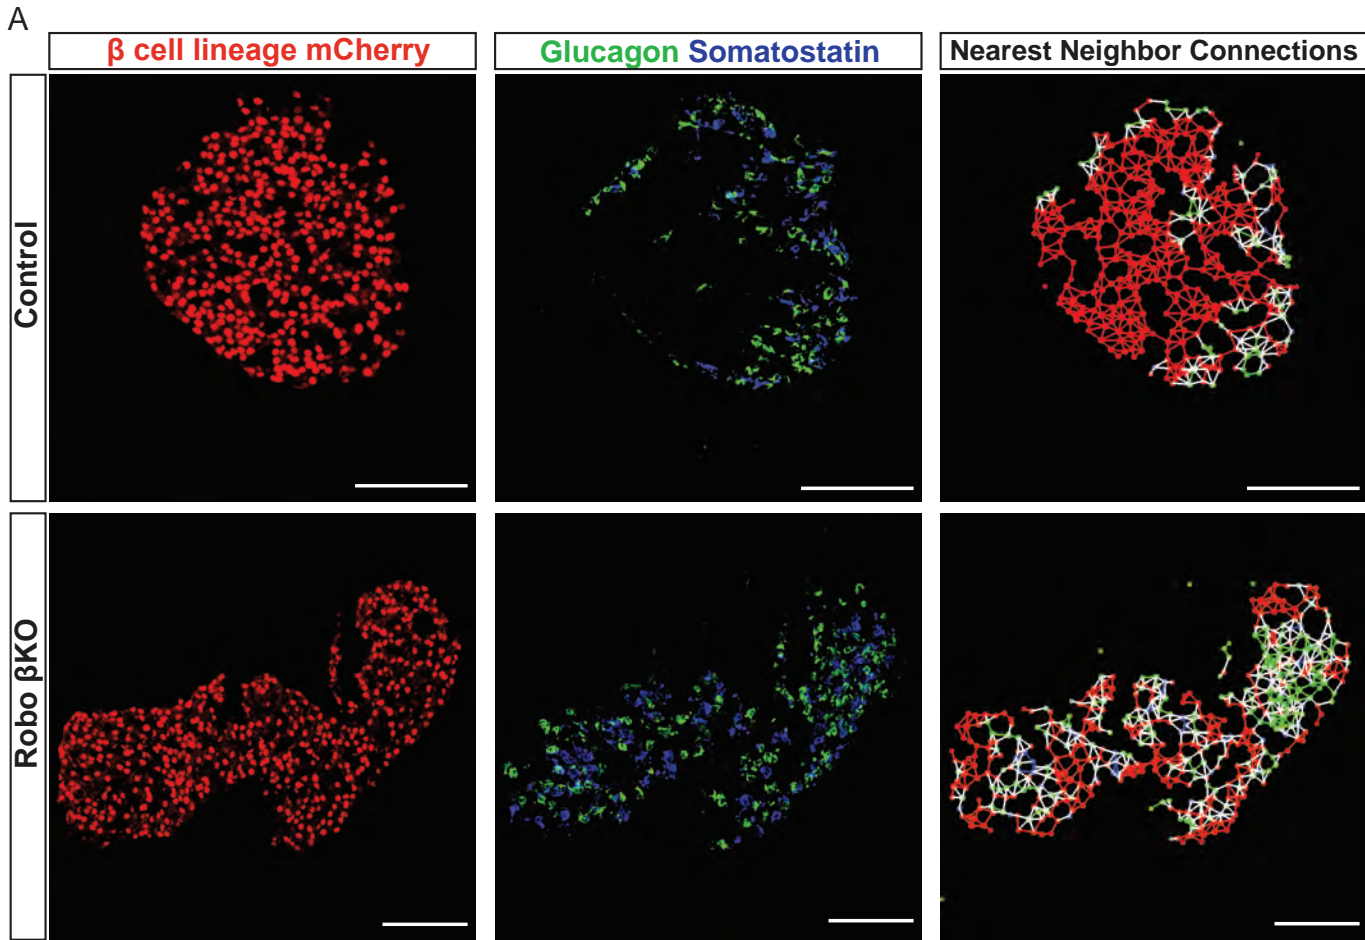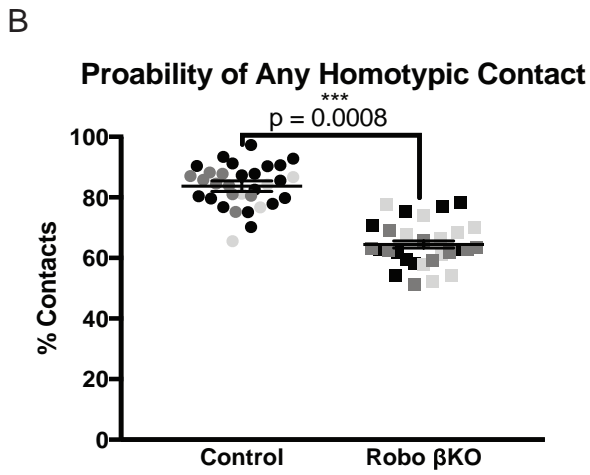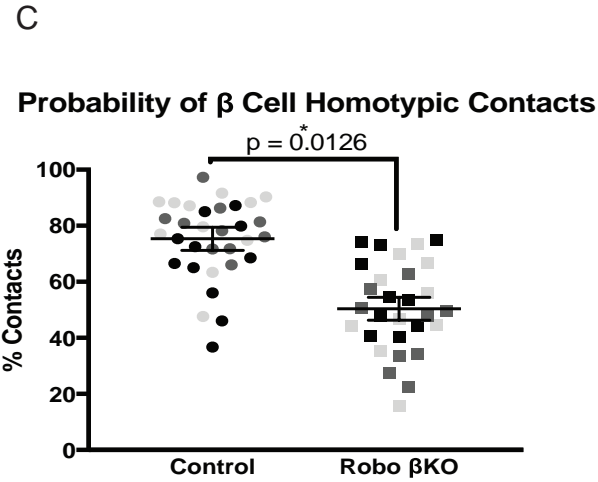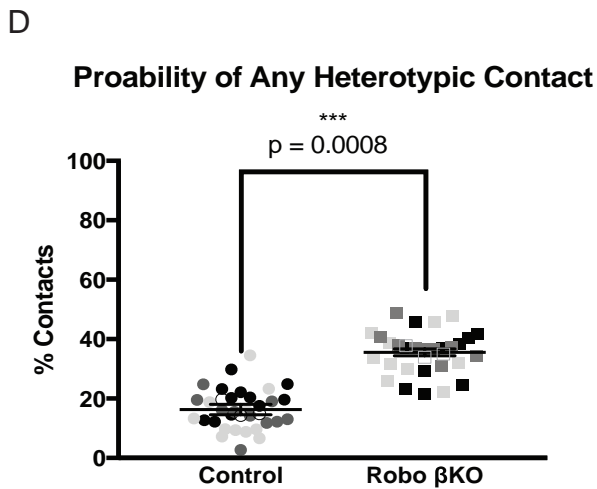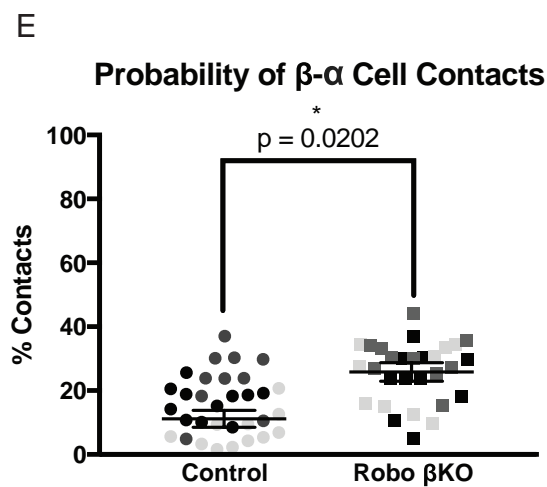

## Figure 2

A

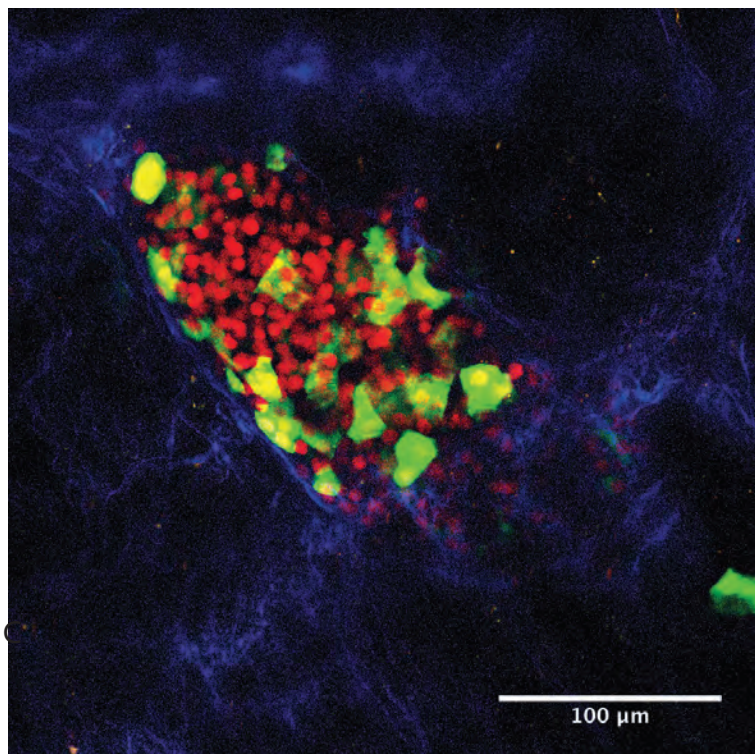

B

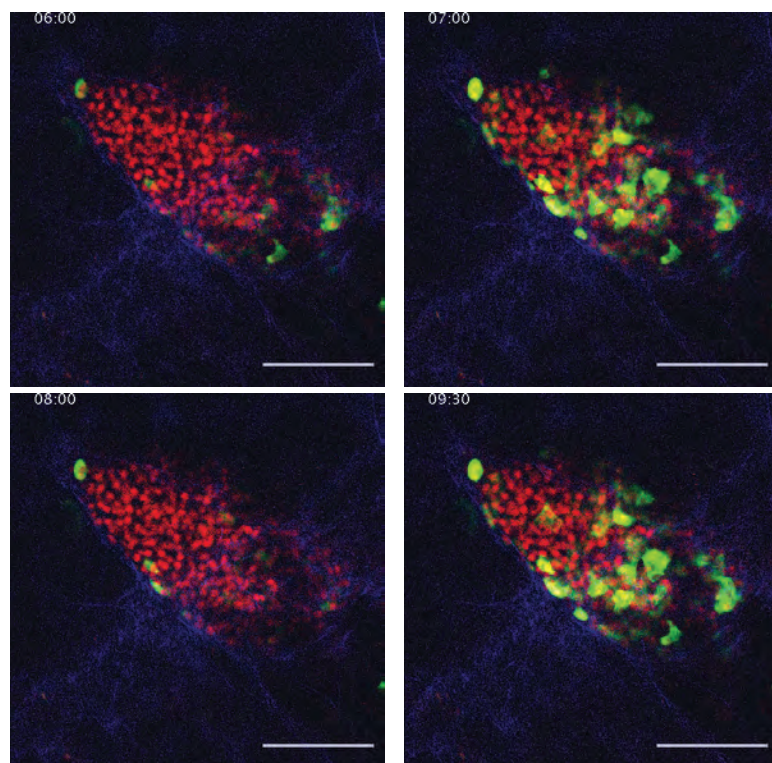

C

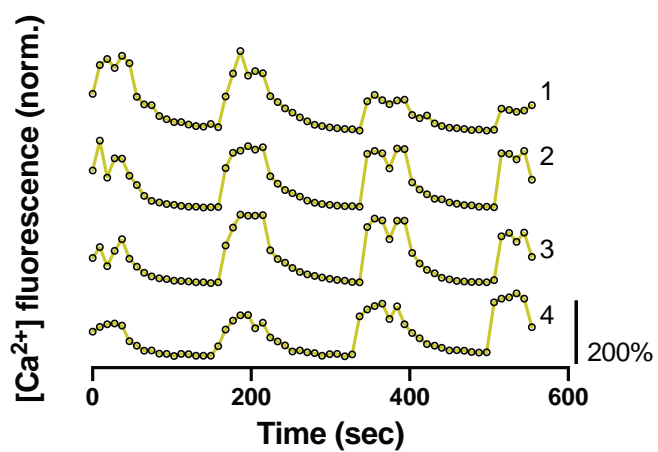

D

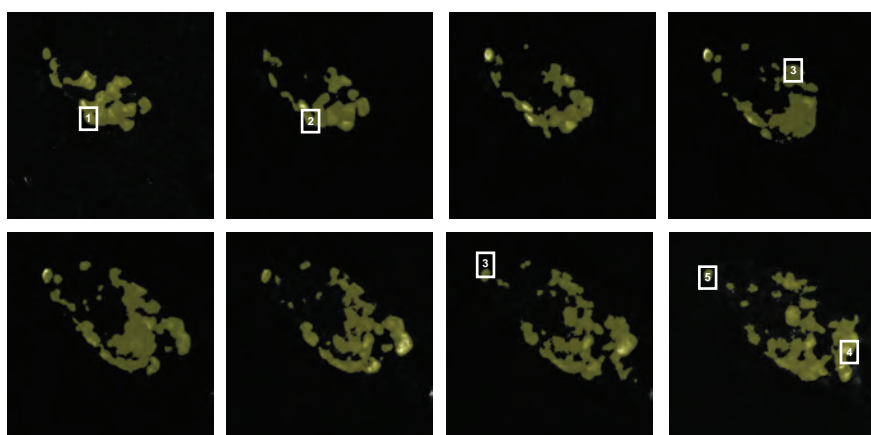

# Figure 3

A

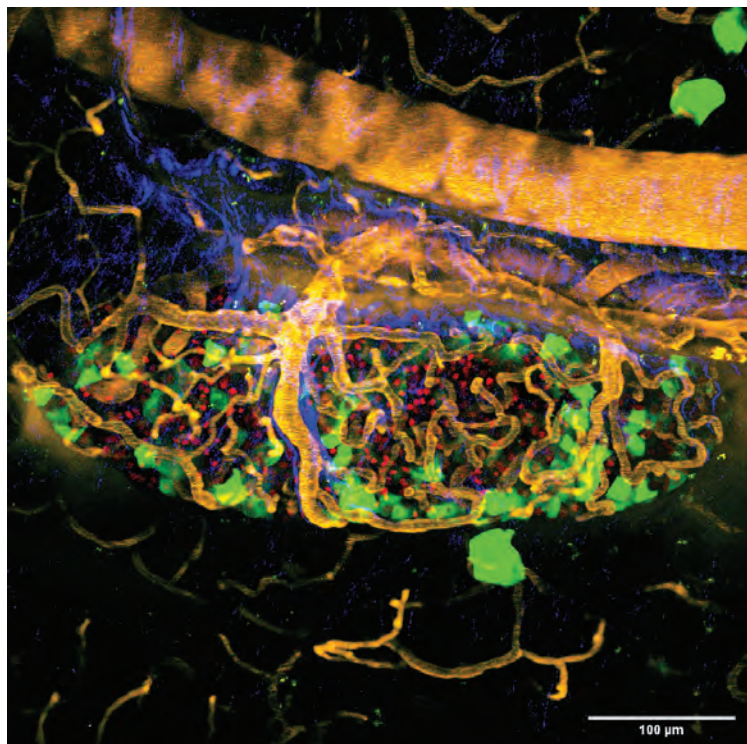

B

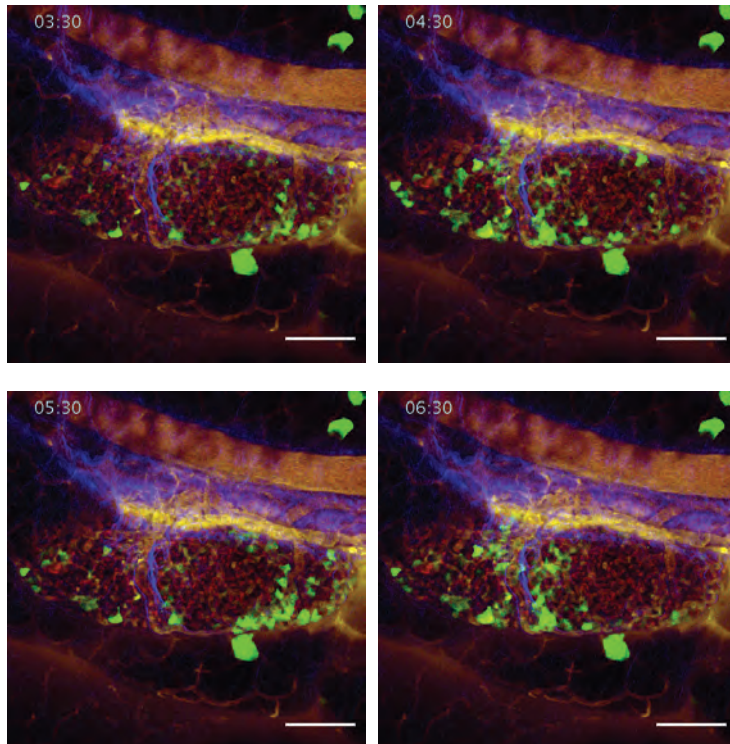

C

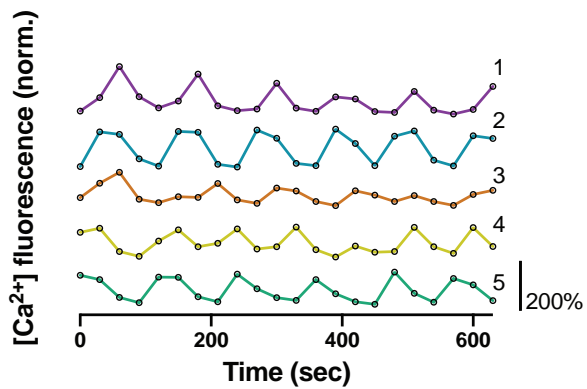

D

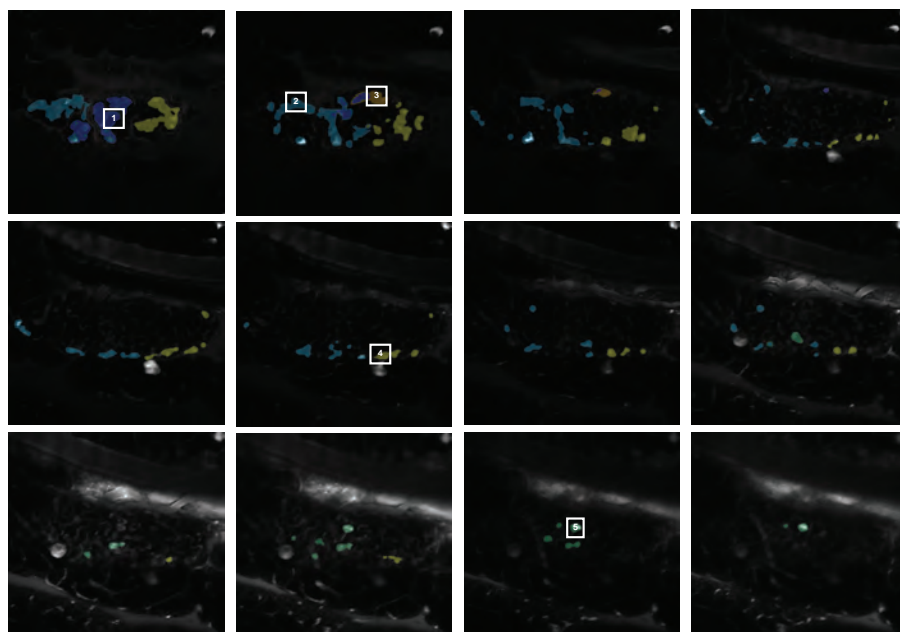



# Figure 4

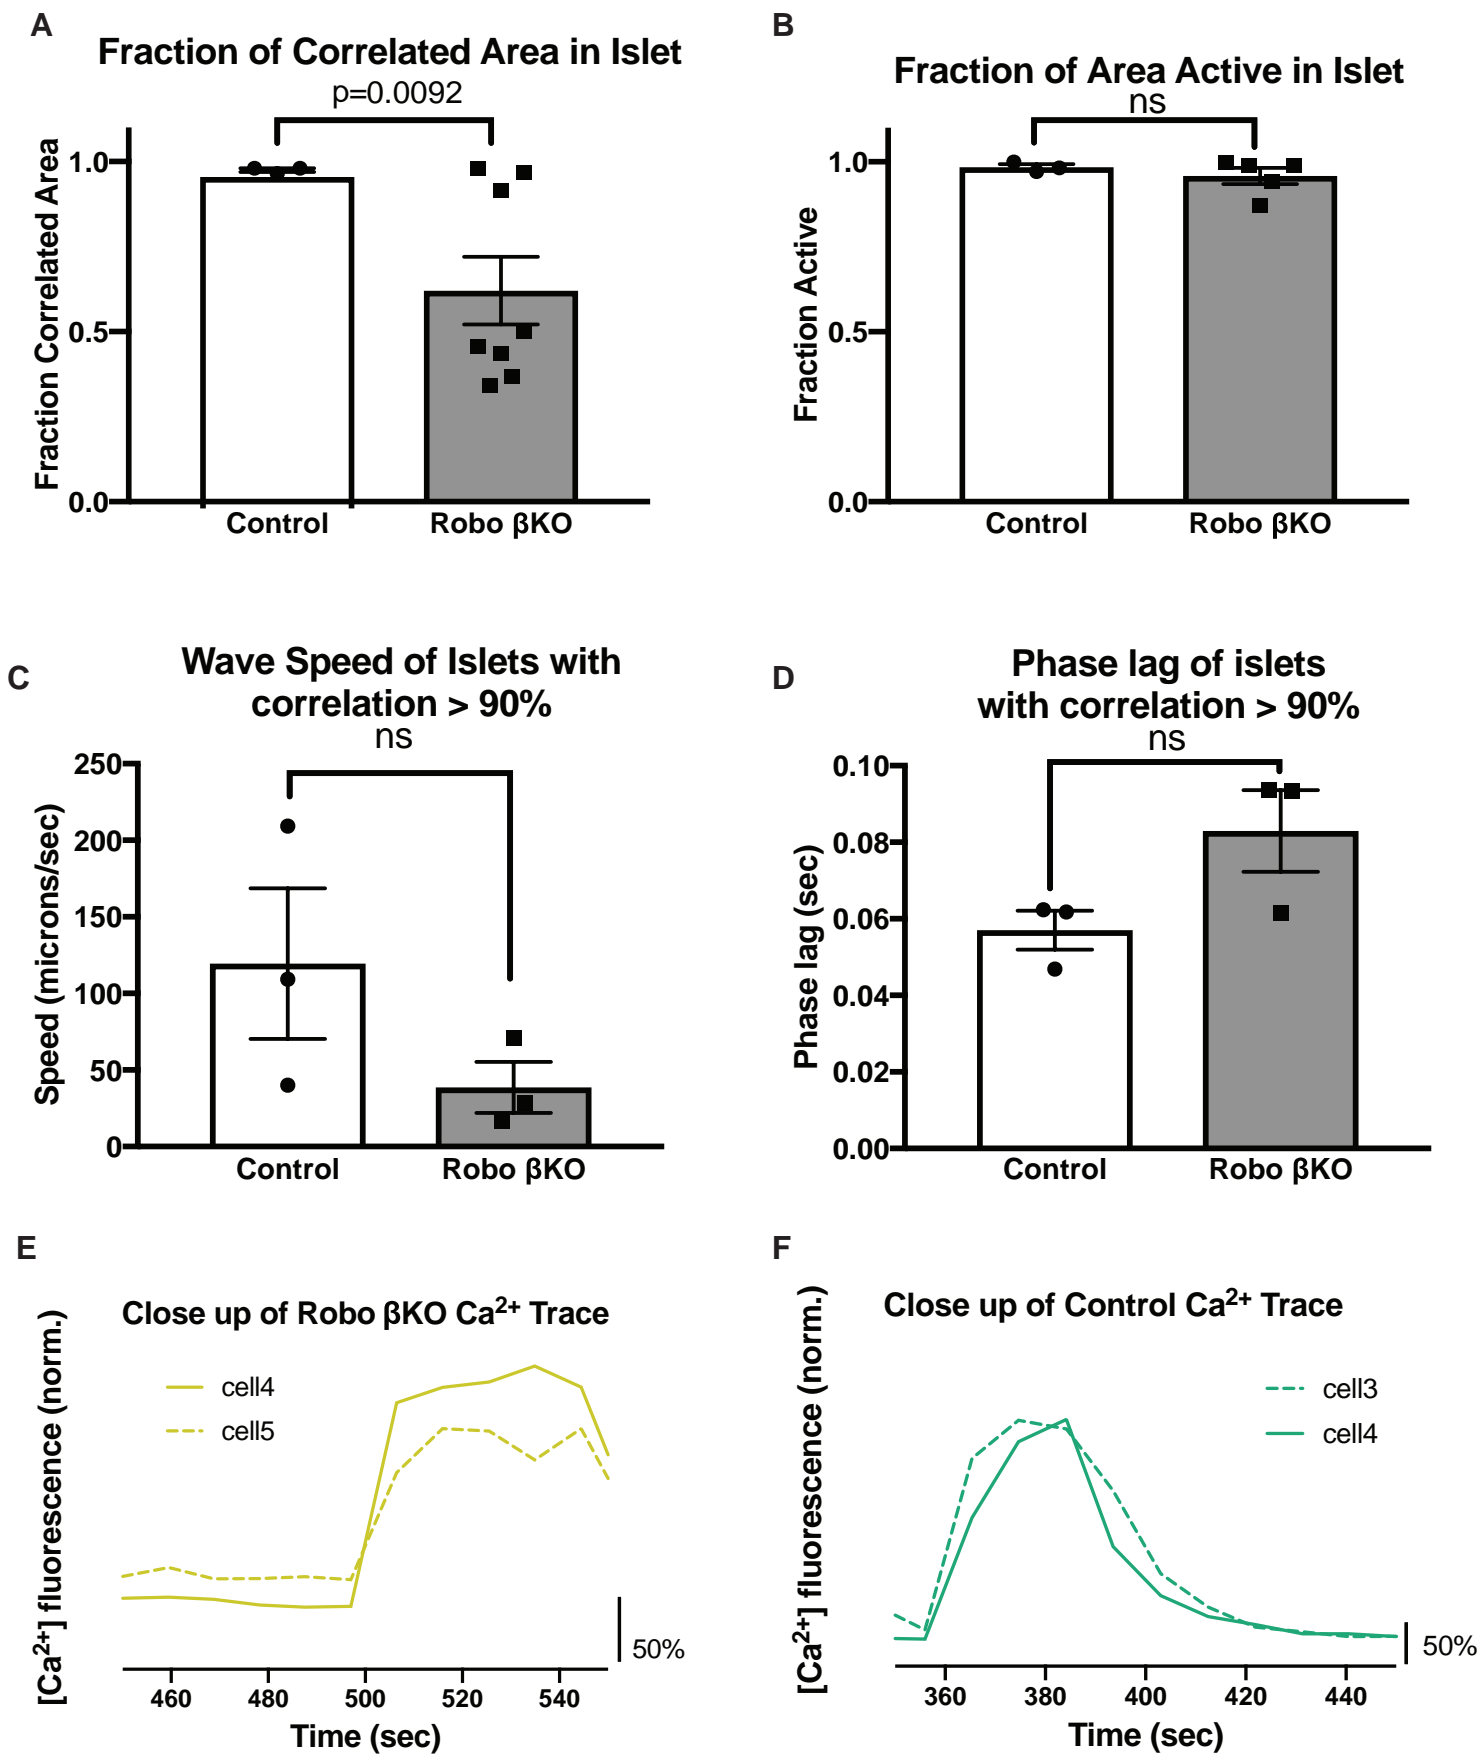

# Figure 5

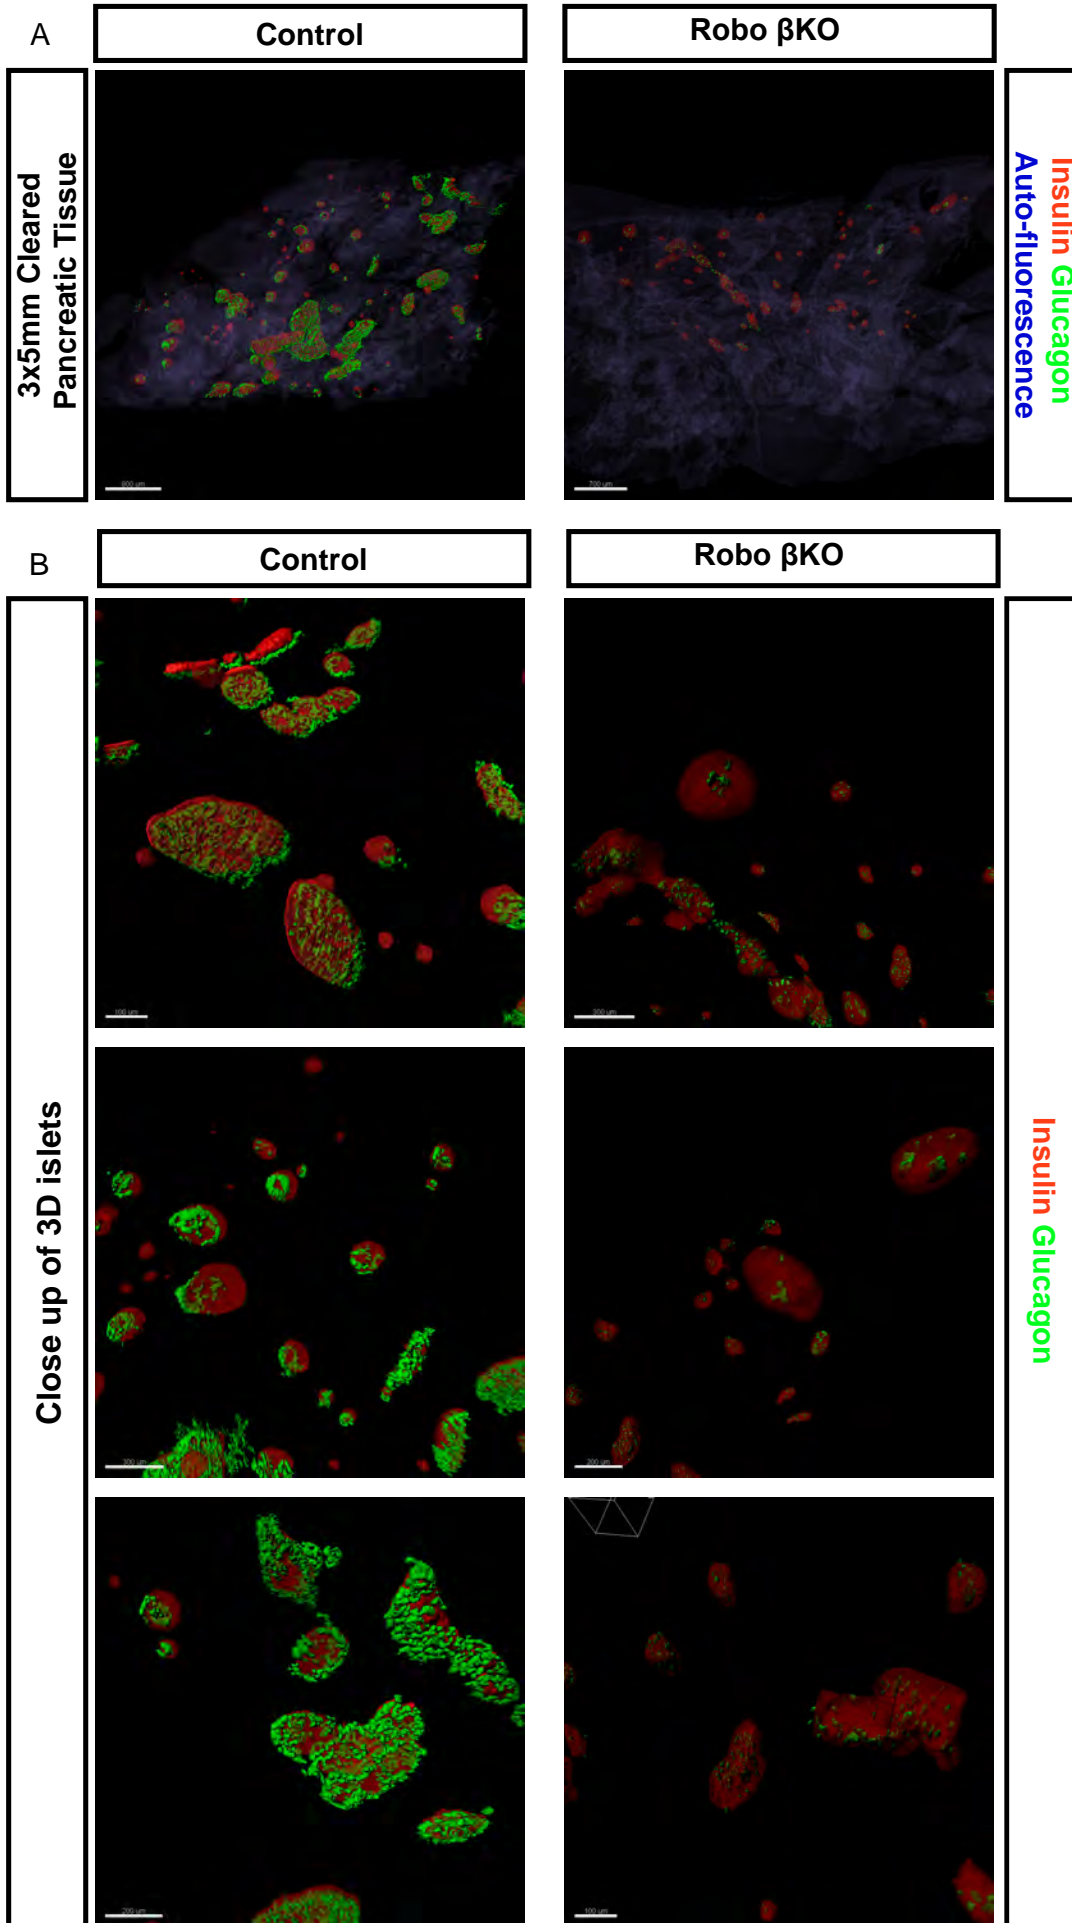

# Figure 6

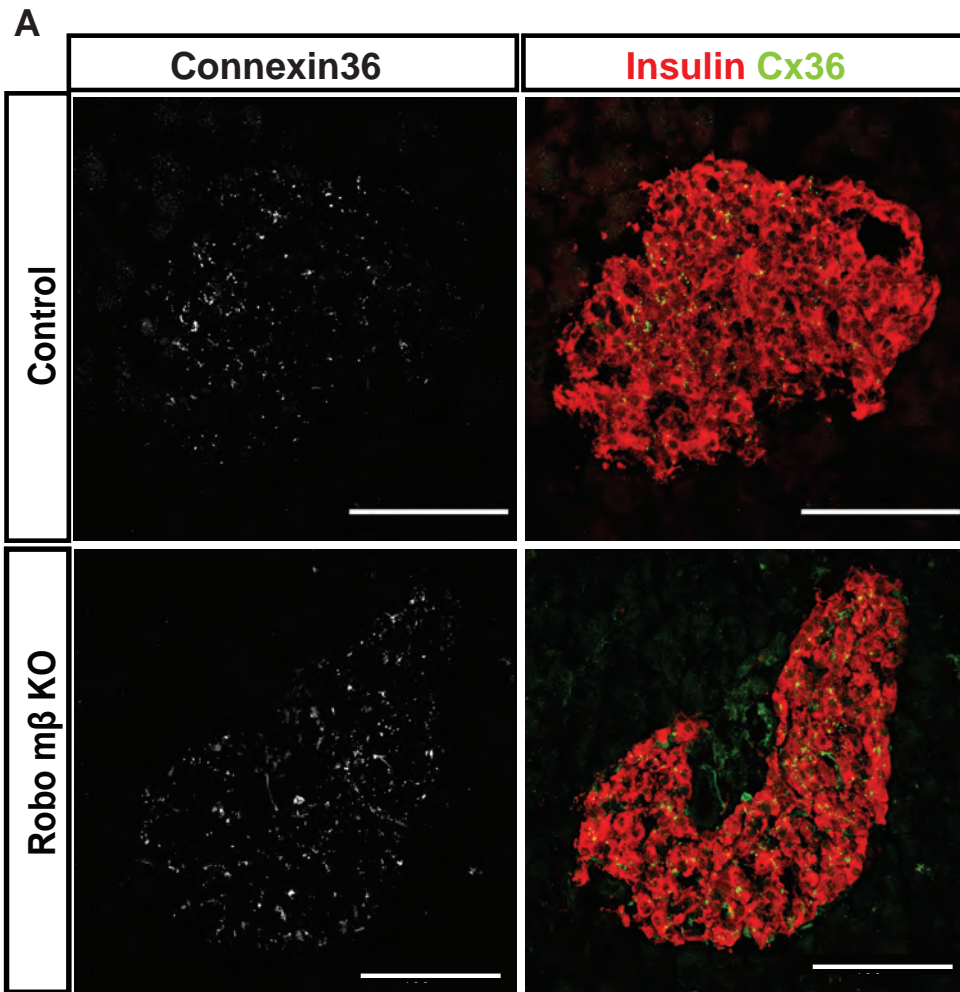

**B**

## Connexin36 in Robo $\beta$ KO islets vs. Controls

n.s.  $p = 0.17$

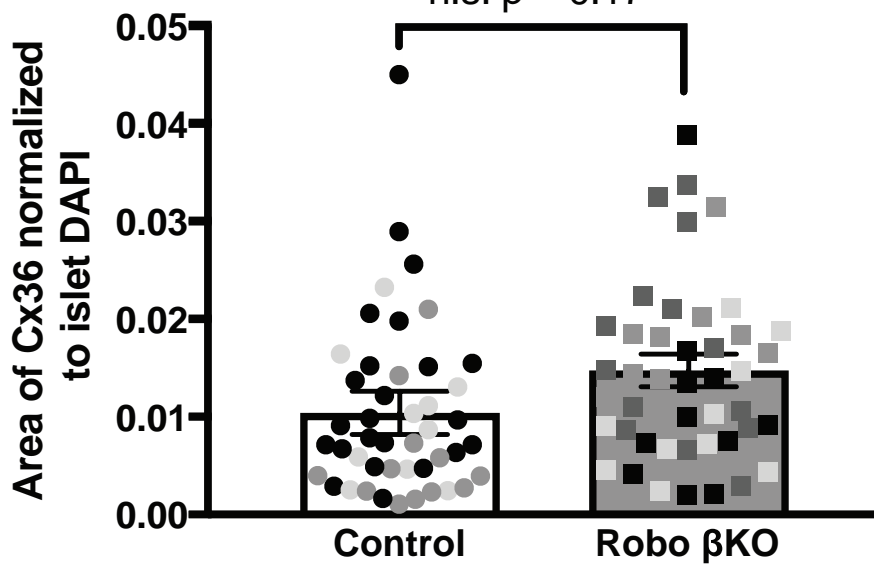

# Figure 7

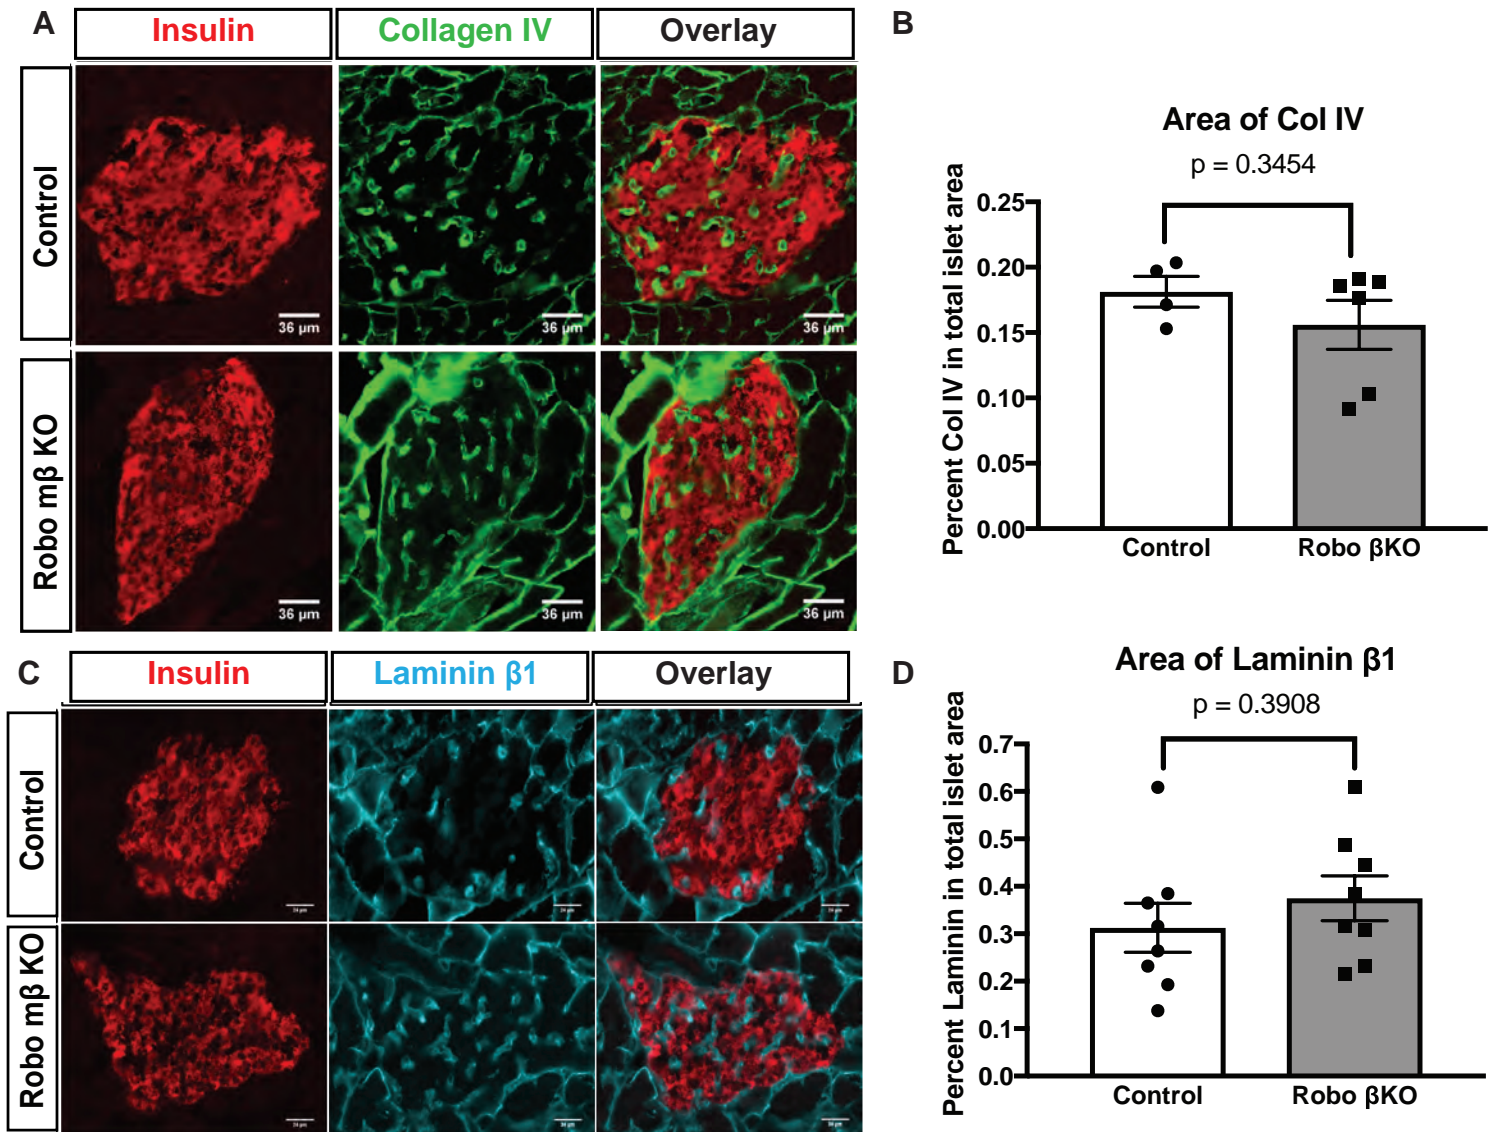

Source: https://www.biorxiv.org/content/10.1101/2019.12.11.873471v1.full.pdf
